# Supplementary material for: Dynamic Transcriptomic and Metabolomic Analyses of Madhuca pasquieri (Dubard) H. J. Lam During the Post-germination Stages
Source: Frontiers journal article supplement (doi:10.3389/fpls.2021.731203), 2021-09-30
Supplement: Data_Sheet_1.ZIP [file Data_Sheet_1.ZIP]

## Sheet: 2020092419275243-all.exp
Supplementary Table 2 | Total identified metabolites in five development stages of M. pasquieri with three biological replicates in each stage.
Index	Q1(Da)	Q3(Da)	Molecular Weight (Da)	Formula	Ionization model	Compounds	Class	CAS	stage1-1	stage1-2	stage1-3	stage2-1	stage2-2	stage2-3	stage3-1	stage3-2	stage3-3	stage4-1	stage4-2	stage4-3	stage5-1	stage5-2	stage5-3
HmLn000873	331.07	169.01	332.075	C13H16O10	[M-H]-	2-O-Galloyl-β-D-glucose	Tannins	-	3778000	2993600	3086100	6743600	3629500	3690400	4590400	5791600	9204300	3652700	4222100	5063500	9	9	9
HmLn003754	521.2	359.149	522.21	C26H34O11	[M-H]-	Icariside E5	Others	126176-79-2	91263	104010	15333	102160	98549	142800	62987	35334	132350	41479	42969	57019	63102	112830	37778
Hmbp008233	459.34	441.33	458.339	C29H46O4	[M+H]+	Ovalifoliolides A	Terpenoids	-	9	9	9	9	9	9	32900	9	9	9	9	9	9	13654	18524
Hmcn001943	639.2	477.16	640.201	C29H36O16	[M-H]-	(R)-Campneoside II	Phenolic acids	-	9	9	9	27913	9	9	35927	9	61108	138180	59612	131900	4817700	2593000	2274500
Hmcp000220	142.12	84.08	141.116	C8H15NO	[M+H]+	Isopelletierine	Alkaloids	4396-01-04	167960	198130	228760	68183	101800	65979	205700	139100	266410	85406	64764	137760	252220	238830	183180
Hmcp002187	509.13	347.07	508.121	C23H24O13	[M+H]+	Limocitrin 3-galactoside	Flavonoids	-	82043	87049	129100	386770	311020	287850	216490	90545	414540	322510	146140	451600	431680	478990	554880
Hmcp002268	493.13	331.08	492.126	C23H24O12	[M+H]+	Limocitrin 3-rhamnoside	Flavonoids	-	3572300	3165800	3481200	3698700	4572000	5632800	3200600	4798100	4042800	5970900	9061000	5065000	1751000	1693000	1340500
Hmcp002316	449.11	317.06	448.1	C21H20O11	[M+H]+	Isorhamnetin-O-Pentoside	Flavonoids	-	150090	176680	179480	99088	134680	168720	31171	98731	65280	103570	241830	58666	9	9	9
Hmcp002399	509.13	347.07	508.121	C23H24O13	[M+H]+	Limocitrin 3-glucoside	Flavonoids	-	409260	447330	569490	986310	1358800	1665700	1000700	637220	1799500	1286100	702120	1770500	1850700	2038500	2279000
Hmcp002539	463.12	317.06	462.116	C22H22O11	[M+H]+	Isorhamnetin-O-rhamnoside	Flavonoids	-	1250100	2000200	1659000	617910	908360	1255200	501790	742570	607110	5939000	6985400	5352600	10828000	10402000	8968800
Hmcp002575	359.15	327.12	358.141	C20H22O6	[M+H]+	Clemaphenol A	Lignans and Coumarins	362606-60-8	16854	9406.9	16967	6418.3	17376	7263	29429	33963	112960	517950	159720	409550	851210	871690	623830
Hmfn00531	175.03	87.0088	176.033	C6H8O6	[M-H]-	L-Ascorbic acid	Others	50-81-7	827460	250110	311250	151460	34136	195790	46863	71426	1205500	1174800	1547500	5495000	506630	430540	303870
Hmjn003948	487.35	487.354	488.35	C30H48O5	[M-H]-	Madasiatic acid	Terpenoids	26532-66-1	26837000	10232000	21494000	33703000	33228000	29832000	21525000	30145000	31283000	28737000	25979000	29259000	19779000	20578000	23639000
Hmjn008136	469.33	469.333	470.34	C30H46O4	[M-H]-	Camaldulenic acid	Terpenoids	71850-15-2	100600	19369	51006	151710	227490	59933	516920	168780	312170	141520	41487	117200	291810	1355100	1991400
Hmjp002337	193.04	133.028	192.033	C10H8O4	[M+H]+	Isoscopoletin (6-Hydroxy-7-Methoxycoumarin)	Lignans and Coumarins	776-86-3	1095800	579800	839600	480460	747140	482340	576570	187300	1991100	395100	631480	570100	361830	458850	455150
Hmln001933	479.09	316.023	480.091	C21H20O13	[M-H]-	Myricetin 3-O-galactoside	Flavonoids	-	3594700	3725600	3759500	14242000	15251000	16824000	20101000	21823000	34335000	50029000	32276000	67768000	44853000	42637000	46006000
Hmln002189	549.09	505.109	550.096	C24H22O15	[M-H]-	Quercetin 3-O-(6′′-O-malonyl)-galactoside	Flavonoids	-	460830	560550	633620	418450	1123900	1064400	728770	710270	1365500	755380	523120	1062200	142050	76378	91581
Hmln002199	505.1	300.033	506.107	C23H22O13	[M-H]-	Quercetin 3-O-(6′′-O-acetyl)-galactoside	Flavonoids	-	360430	802380	949740	608450	1684700	1380300	772160	883680	1282100	646400	726090	831650	254480	113450	119120
Hmln002402	533.1	489.111	534.101	C24H22O14	[M-H]-	Kaempferol 3-O-(6′′-O-malonyl)-galactoside	Flavonoids	-	149980	115360	103530	162820	348300	162360	257550	393490	350490	368610	268210	526540	146540	78716	89821
Hmln002483	533.1	489.106	534.101	C24H22O14	[M-H]-	Kaempferol 3-O-(6′′-O-malonyl)-glucoside	Flavonoids	-	138090	120070	119620	165740	299080	169000	324160	448800	309090	362310	282320	511040	142780	85755	78755
Hmln002535	515.12	353.088	516.127	C25H24O12	[M-H]-	3,4-Dicaffeoylquinic acid	Phenolic acids	14534-61-3	20852	9	9596.2	46451	44775	24322	251210	330070	230650	298230	231460	44409	369620	1702800	5568200
Hmln003605	503.34	485.329	504.346	C30H48O6	[M-H]-	Myrianthic acid	Terpenoids	89786-84-5	934970	225900	583380	2642900	3970700	3037500	3082200	3603400	3227700	2621800	1893000	2460000	1173000	2558200	3074100
Hmmp004534	946.54	455.355	928.504	C47H76O18	[M+NH4]+	Hederagenin-O-Hexoside-O-Hexoside-O-Pentoside	Terpenoids	-	33166	39947	25565	15368	11848	16267	5503.7	11598	11403	19975	24585	15691	1403.3	9	1665.6
Hmpp003270	449.1	287.05	448.091	C21H20O11	[M+H]+	Luteolin-4'-O-β-D-glucoside	Flavonoids	-	507360	401550	607730	2392600	2349900	1459400	3111300	4746400	6796000	10582000	4195200	15956000	1988300	1853400	2111600
Hmpp003391	449.1	287.05	448.091	C21H20O11	[M+H]+	Luteolin-3'-O-β-D-glucoside	Flavonoids	-	833280	447160	489920	2314800	2321900	1331500	3342600	4081100	6001800	11070000	4202000	16920000	2406400	1700000	1884700
Hmqp006235	516.3	184.075	515.297	C21H46N3O9P	[M+H]+	LysoPC 18:4	Lipids	-	1010.7	9	658.55	9744.2	8360.6	7331.4	34012	2490.7	50493	8973.2	9	2350.8	8024.1	30505	12953
Hmtn001302	299.08	137.024	300.085	C13H16O8	[M-H]-	Glucosyloxybenzoic acid	Phenolic acids	-	2207500	2035200	2171100	15460000	21238000	30896000	11162000	19577000	4730400	13151000	9190600	11830000	7326000	15114000	15258000
Hmyn001360	299.11	59.0128	300.135	C18H20O4	[M-H]-	Doitungbiphenyl A	Others	-	148320	157400	149500	161240	139660	195450	166560	173880	513000	100800	126880	112960	165540	111840	99834
Hmyn007081	481.25	245.04	482.262	C22H43O9P	[M-H]-	LysoPG(16:1)	Lipids	-	5479.4	2084.8	6150.4	20679	84811	11609	351230	36890	141960	402080	234250	676210	4762400	8297000	2436300
Li512111	519.11	315.051	520.1	C24H24O13	[M-H]-	Isorhamnetin acetyl hexoside	Flavonoids	-	45169	63157	93779	98107	348790	281140	211660	99983	161500	95069	96945	169410	74251	59312	56743
Lmbp003393	449.11	287.053	448.1	C21H20O11	[M+H]+	Quercetin-3-O-α-L-rhamnopyranoside	Flavonoids	-	634480	497790	582700	2274300	2347700	1702100	3394000	3832100	7297100	11514000	4551300	16375000	2372700	1723200	2159700
Lmbp003668	419.1	287.054	418.09	C20H18O10	[M+H]+	Kaempferol-3-arabinopyranoside	Flavonoids	-	18846	20726	28847	70337	64767	31307	106220	219260	167670	340320	170490	522590	81373	57129	49267
Lmbp003737	433.11	287.055	432.105	C21H20O10	[M+H]+	Kaempferol-3-O-rhamnoside	Flavonoids	482-39-3	1978900	1214300	1772600	2528000	2059700	1662000	1334000	1590800	2993000	5703400	5347700	8674600	2939100	2631500	2576600
Lmdp003509	435.09	303.061	434.084	C20H18O11	[M+H]+	Quercetin 3-O-β-D-xylopyranoside	Flavonoids	549-32-6	184940	177300	263340	498140	605460	462440	436270	485800	950070	1225900	672320	1932100	526180	415630	441910
Lmdp003994	461.14	299.091	460.137	C23H24O10	[M+H]+	Wistin (6,4'-Dimethoxyisoflavone-7-glucoside)	Flavonoids	19046-26-5	86393	56415	74863	160250	128120	90867	127230	178720	182110	236580	198150	327280	64438	61763	51812
Lmgn001670	137.03	108.023	138.032	C7H6O3	[M-H]-	Salicylic acid	Phenolic acids	69-72-7	31812	21024	22080	46228	34667	42955	126130	84503	89337	39091	12975	43655	223230	210180	216150
Lmhn002321	461.07	167.04	462.08	C21H18O12	[M-H]-	Vanilloylcaffeoyltartaric acid	Phenolic acids	-	4053300	10316000	7745700	13012000	10101000	10102000	8192400	8963800	12909000	7664100	11190000	4839100	7669400	4641400	4948600
Lmhn002573	399.09	205.04	400.101	C17H20O11	[M-H]-	Sinapoylglucuronic acid	Phenolic acids	-	19713	8704.1	12356	24267	14495	5533.1	18716	5675.1	37680	5698.1	9	9	9	9	10274
Lmhn002926	279.05	163.04	280.058	C13H12O7	[M-H]-	p-Coumaroylmalic acid	Phenolic acids	-	15509	6427.9	8896.5	60396	31655	14409	17516	59000	6791.3	35257	36147	35600	17543	18138	9
Lmhn003240	237.04	121.03	238.048	C11H10O6	[M-H]-	Benzoylmalic acid	Phenolic acids	-	55948	28035	40655	56812	37280	24262	46778	71498	36073	69214	35589	27247	17373	40350	43240
Lmhp003217	625.17	317.06	624.169	C28H32O16	[M+H]+	2'-Hydoxy,5-methoxy Genistein-O-rhamnosyl-glucoside	Flavonoids	-	179960	390940	293870	22258	162260	298270	288430	294850	571190	220160	410760	14669	38605	29535	15982
Lmln001856	479.09	316.023	480.091	C21H20O13	[M-H]-	5,7-Dihydroxy-4-oxo-2-(3,4,5-trihydroxyphenyl)-4H-chromen-3-yl-β-D-allopyranoside	Others	-	3475400	3871700	4841300	15210000	13755000	14249000	18262000	21458000	37759000	47538000	28549000	62650000	46806000	42948000	49384000
Lmlp002133	165.05	147.047	164.047	C9H8O3	[M+H]+	Trans-p-Hydroxycinnamic acid	Phenolic acids	-	3582.4	2452.1	669.75	4526.5	5130.5	2568	3739.7	5571.2	1906.4	8856	8004.2	9482	29807	38198	37627
Lmmn002588	625.14	316.023	626.148	C27H30O17	[M-H]-	Gossypetin-rutinoside	Flavonoids	-	9	9	9	8120	25107	27687	51113	52754	147390	918790	710650	918680	215940	445640	1308400
Lmmp003091	611.16	303.05	610.153	C27H30O16	[M+H]+	Quercetin glucoside-rhamnoside	Flavonoids	-	192380	407520	303520	19176	135060	308300	247360	261710	516150	208650	304670	20278	30222	27204	12233
Lmmp004257	463.12	317.06	462.116	C22H22O11	[M+H]+	Methylquercetin rha	Flavonoids	-	134710	200000	253500	97390	137240	221080	102910	127800	64848	396250	193580	209790	320760	239440	148080
Lmnn002886	477.14	179.03	478.148	C23H26O11	[M-H]-	1'-O-β-D-(3,4-Dihydroxyphenethyl)-O-caffeoyl-glucoside	Phenolic acids	-	50079	45038	26103	44152	9	9	39087	24047	79648	515000	463310	575890	1090400	1230400	1279400
Lmqp001565	139.04	121.028	138.031	C7H6O3	[M+H]+	p-Hydroxybenzoic Acid	Phenolic acids	-	12699	10988	21122	23391	44541	40022	44383	52501	57706	91567	88398	69277	159360	123850	110520
Lmtn002565	329.11	167.03	330.095	C14H18O9	[M-H]-	1'-O-Vanilloyl-β-D-glucoside	Phenolic acids	-	15939000	5537200	9349100	11248000	7351300	3390600	18403000	29415000	27685000	7332200	3188900	6244000	109520	134300	223930
Lmtn002796	449.1	287.05	450.116	C21H22O11	[M-H]-	Aromadendrin 7-glucoside	Others	-	62516000	56159000	58348000	63993000	52184000	30843000	38986000	54888000	4641500	33644000	11265000	46109000	2828400	3231600	4459600
Lmtp001399	312.11	150.054	311.101	C14H17NO7	[M+H]+	5,6-Dihydroxyindole-5-O-β-glucoside	Alkaloids	-	1678.1	9	9	24369	19304	1814.7	60463	73500	64905	78229	38007	44608	92660	85413	98861
Lmyp004617	419.13	257.081	418.127	C21H22O9	[M+H]+	Pinocembrin 7-O-β-D-glucoside(Pinocembroside)	Flavonoids	75829-43-5	607990	998420	842620	517350	680750	71880	424800	117880	1501100	755280	2430700	57760	15733	53003	45689
Lmzn001582	387.17	207.102	388.174	C18H28O9	[M-H]-	5'-Glucopyranosyloxyjasmanic acid	Phenolic acids	-	1795100	2058200	2099700	2476600	1563200	1226400	1458700	1030700	1480100	1035300	1719700	1799700	78993	50925	65966
Lmzn004190	487.35	469.334	488.35	C30H48O5	[M-H]-	Tormentic Acid	Phenolic acids	13850-16-3	116800	8744.7	56554	836880	923230	387080	1208500	2172800	1359700	831180	796560	592160	448870	594120	898650
Lmzp004885	331.08	315.05	330.074	C17H14O7	[M+H]+	Tricin	Flavonoids	520-32-1	9608.8	4074	4635.8	3537.7	42874	4175	43764	42199	7737.4	8221.1	8957.4	16332	587200	360740	301320
Lnrp002670	625.17	317.067	624.169	C28H32O16	[M+H]+	Isorhamnetin glc-rha	Flavonoids	-	181820	413180	298140	24093	143190	290160	297200	305440	653460	235730	366730	9002.2	32678	32598	12136
Lnrp102163	757.21	449.108	756.211	C33H40O20	[M+H]+	Quercetin rha-galactoside-rhamnoside	Flavonoids	-	4037.5	3275.3	2458.3	9	2016.5	2094.1	1829.4	5341.3	2115.5	4776	9	4428.4	64397	38048	53387
Rfmb089	313.24	295.233	314.222	C18H34O4	[M-H]-	9,10-Dihydroxy-12-octadecenoic acid	Lipids	263399-34-4	5813.1	7122.4	7740.6	13711	25762	13257	2503700	6639.6	5417.9	5552	5003.5	4675.4	14541	12946	15417
Rfmb090	295.23	195.139	296.214	C18H32O3	[M-H]-	13-Hydroxy-9,11-octadecadienoic acid	Lipids	5204-88-6	1193200	882780	1041400	579890	1891000	2730900	11368000	810390	350870	513920	649940	387350	496920	463810	402930
Rfmb091	295.23	195.139	296.214	C18H32O3	[M-H]-	9-Hydroxy-10,12-octadecadienoic acid	Lipids	15514-85-9	1165300	882250	975500	571020	1869700	2589100	11118000	783210	325680	500710	609150	375240	486030	468900	402640
Rfmb319	130.09	84.0843	129.07	C6H11NO2	[M+H]+	Pipecolic acid	Amino acids and derivatives	4043-87-2	828990	995790	1003700	407290	936510	1525400	1498000	2219600	2799300	1519700	699390	965570	1012000	3384400	3989300
mws0001	133.05	74	132.046	C4H8N2O3	[M+H]+	L-Asparagine Anhydrous	Amino acids and derivatives	70-47-3	6937000	9160700	9909800	35667000	32377000	35286000	31531000	23254000	45093000	17727000	18972000	3885900	13731000	22231000	28310000
mws0005	161.1	144	160.091	C10H12N2	[M+H]+	Tryptamine	Alkaloids	61-54-1	13898	35438	22766	223900	172960	204980	732860	155190	254540	449310	21977	945980	36001000	16316000	69948
mws0014	193.06	134.01	194.049	C10H10O4	[M-H]-	Ferulic acid	Phenolic acids	1135-24-6	9	3000.9	9	6925.2	60302	8652.5	39798	35804	17636	19755	14904	14227	70209	50719	24423
mws0024	169.02	125	170.015	C7H6O5	[M-H]-	Gallic acid	Flavonoids	149-91-7	2367700	2039700	2624300	755320	5018400	1078000	3125500	4455800	3057500	3437300	2441300	3549300	18489000	11391000	7821600
mws0027	197.05	123	198.044	C9H10O5	[M-H]-	Syringic acid	Phenolic acids	530-57-4	11706	6659.4	13227	14451	56094	15026	36856	35758	37881	25451	38656	16424	124390	100990	98840
mws0032	319.04	153	318.027	C15H10O8	[M+H]+	Myricetin	Flavonoids	529-44-2	9	94980	78103	14613	141640	29383	57884	36800	132860	101310	47007	82656	1415800	534110	664460
mws0034	457.2	169	458.068	C22H18O11	[M-H]-	Epigallocatechin gallate	Flavonoids	989-51-5	733780	886090	791440	510420	613520	1107700	1462500	1554800	1651600	4643600	4040300	3117900	5277200	6132200	8347100
mws0042	305	125	306.061	C15H14O7	[M-H]-	(-)-Epigallocatechin	Flavonoids	970-74-1	46403000	45657000	54079000	33937000	32945000	41170000	39036000	49295000	46395000	40680000	49914000	40500000	14944000	17144000	22669000
mws0044	303.06	125	304.047	C15H12O7	[M-H]-	Taxifolin	Flavonoids	480-18-2	9	9	9	92596	986640	111850	314730	168410	132740	309380	117940	466660	222680	205460	412590
mws0045	449.1	303.05	448.082	C21H20O11	[M+H]+	Quercitrin	Flavonoids	522-12-3	10164000	10705000	13136000	14641000	15314000	16590000	10252000	8357700	16130000	11597000	10556000	13992000	2465000	2376100	2403200
mws0048	431.11	311	432.088	C21H20O10	[M-H]-	Vitexin	Flavonoids	3681-93-4	618920	921300	714960	228210	307970	437320	144240	271460	83017	194460	276400	94490	8250.3	20170	23321
mws0049	307	139	306.061	C15H14O7	[M+H]+	(+)-Gallocatechin	Flavonoids	970-73-0	37193000	40638000	40273000	40354000	39667000	41309000	43561000	45764000	45048000	43460000	42925000	47381000	29475000	34802000	33874000
mws0054	289.08	245	290.067	C15H14O6	[M-H]-	Catechin	Flavonoids	154-23-4	17796000	15232000	13285000	16917000	19373000	20080000	18725000	24588000	20075000	21469000	19114000	24604000	5968500	6554400	8212900
mws0056	463.1	316	464.076	C21H20O12	[M-H]-	Myricitrin	Flavonoids	17912-87-7	70030000	75323000	78875000	77692000	72953000	74524000	76958000	72762000	75956000	100370000	86636000	100480000	91008000	105410000	96595000
mws0061	463.1	300	464.076	C21H20O12	[M-H]-	Hyperin	Flavonoids	482-36-0	1591700	1111400	1808100	7954400	8280100	5722200	8935100	4314700	21814000	6231100	3998700	11404000	2090000	1222200	1403800
mws0062	287.05	241	286.038	C15H10O6	[M+H]+	Orobol	Flavonoids	480-23-9	53278	53032	61247	88873	72913	39298	56252	55866	49057	176230	87582	280340	68364	71984	67623
mws0063	271.05	215	270.044	C15H10O5	[M+H]+	Genistein	Flavonoids	446-72-0	2008.7	2630.6	9	9	9	2198.9	9	9	9	9	9	9	23365	20379	12019
mws0072	433.11	271.01	432.088	C21H20O10	[M+H]+	Apigenin 5-O-glucoside	Flavonoids	28757-27-9	20524000	21181000	21179000	14451000	13794000	19546000	9469900	19457000	4667400	16077000	19919000	11078000	372330	589720	1329100
mws0089	447.09	285.041	448.082	C21H20O11	[M-H]-	Kaempferol 7-O-glucosdie	Flavonoids	16290-07-6	9	9	2406700	674260	676850	263140	654890	827420	1433800	2887600	1010500	5948200	654980	535070	487930
mws0119	227.2	227.203	228.19	C14H28O2	[M-H]-	Myristic Acid	Lipids	544-63-8	1606700	1797100	1573200	1067200	1683900	1349400	10918000	1089500	1600300	913380	753510	636500	2603000	1901300	1783200
mws0120	258.11	104.111	257.103	C8H20NO6P	[M+H]+	Choline alfoscerate	Lipids	28319-77-9	1313500	844880	1158000	1653500	4667500	3657700	2706300	928740	516520	1176500	2263500	812020	2086700	2215300	1207800
mws0124	247.1	130	246.089	C13H14N2O3	[M+H]+	N-(3-Indolylacetyl)-L-alanine	Amino acids and derivatives	57105-39-2	12942	1994.7	5887.3	26130	47247	34723	58867	82501	65779	45142	17061	45463	5362.7	9497.5	3882.8
mws0126	524.37	184.078	523.325	C26H54NO7P	[M+H]+	1-Stearoyl-sn-glycero-3-phosphocholine	Lipids	19420-57-6	299510	83272	176030	224410	337580	113570	296060	322840	63521	124100	122470	115310	398440	271410	247930
mws0133	123.1	79.9	122.043	C6H6N2O	[M+H]+	Nicotinamide	Others	98-92-0	145520	116810	118400	362530	374490	359860	303470	290040	241540	287930	282590	312170	418710	384440	316980
mws0145	151.05	93	152.041	C8H8O3	[M-H]-	2-Methoxybenzoic acid	Phenolic acids	529-75-9	9	9	9	9	9	9	9	5695.9	9	9	9	4675.3	21641	63080	73129
mws0154	173.05	93	174.044	C7H10O5	[M-H]-	Shikimic acid	Organic acids	138-59-0	35557	30530	35342	144090	96490	77828	182420	291370	91158	177210	144800	197200	399770	319260	199490
mws0159	163.05	91	164.041	C9H8O3	[M-H]-	Phenylpyruvic acid	Organic acids	156-06-9	9	9	9	58652	96921	55803	118500	85661	69075	44206	55083	44317	75171	74500	89717
mws0178	353.1	191.01	354.079	C16H18O9	[M-H]-	Chlorogenic acid	Phenolic acids	327-97-9	365560	59677	52828	151450	354860	127910	584020	740450	879440	5437500	2558000	8532100	3215800	2615700	3458600
mws0179	367	190.9	368.093	C17H20O9	[M-H]-	Chlorogenic acid methyl ester	Phenolic acids	29708-87-0	7272.9	6111.8	3790.2	14692	13096	12533	19771	13858	29077	31545	44649	30013	30973	38370	41852
mws0180	153	108	154.021	C7H6O4	[M-H]-	2,5-Dihydroxybenzoic acid	Phenolic acids	490-79-9	53680	40918	39236	45983	189820	19334	249610	121610	92985	99183	51351	111660	848260	686710	673520
mws0191	118.1	59	117.07	C5H11NO2	[M+H]+	Betaine	Alkaloids	107-43-7	889880	584580	816630	815680	1013700	609220	2576900	637790	574490	621710	689990	672350	575980	981520	847290
mws0192	117.03	73	118.021	C4H6O4	[M-H]-	Succinic acid	Organic acids	110-15-6	38914000	28431000	30328000	11917000	29474000	19936000	17916000	14318000	14370000	20883000	14820000	24493000	29744000	33479000	21829000
mws0193	190.1	127	189.099	C7H15N3O3	[M+H]+	L-Homocitrulline	Amino acids and derivatives	1190-49-4	201230	240690	160430	257330	123520	123380	117410	180380	223410	173770	164130	223900	203100	195610	267910
mws0198	179	71	180.053	C6H12O6	[M-H]-	D-(+)-Glucose	Others	50-99-7	1290400	1078300	1163400	1784200	3068300	1638900	2185000	1578100	4793700	2565300	2092000	3876400	648020	511750	694770
mws0206	103.05	57.2	104.041	C4H8O3	[M-H]-	(S)-2-Hydroxybutanoicacid	Organic acids	3347-90-8	3144.8	5562.1	15389	5364.8	42814	4560.2	3336.8	2421.8	3775.5	4670.3	1996.6	2218.2	10864	10254	9311.5
mws0208	145.06	101	146.049	C6H10O4	[M-H]-	Adipic Acid	Organic acids	124-04-9	78585	67439	55244	21074	37077	47584	105570	107730	55016	76888	40756	87455	206030	159220	121270
mws0214	181	71	182.067	C6H14O6	[M-H]-	D-Sorbitol	Others	50-70-4	9	21569	9	19638	9	10320	327810	21013	77955	26851	9	51186	70924	258780	265020
mws0216	132.06	86	131.05	C5H9NO3	[M+H]+	Trans-4-Hydroxy-L-proline	Amino acids and derivatives	51-35-4	25239000	9370300	21825000	928710	1464100	919670	1619900	1431500	757330	1254700	1450400	966690	857070	1290700	1420700
mws0219	132	88	133.03	C4H7NO4	[M-H]-	L-AsparticAcid	Amino acids and derivatives	56-84-8	6176400	5367500	5204600	10450000	5019600	7081500	5055400	5989600	4664200	4044600	4504400	2654000	1602100	1784000	2126400
mws0227	132.1	86.2	131.085	C6H13NO2	[M+H]+	L-Leucine	Amino acids and derivatives	61-90-5	65064000	64736000	63867000	8146500	15141000	9717800	18988000	15744000	8438200	13022000	16076000	8438500	8598900	15920000	14705000
mws0230	120	74	119.05	C4H9NO3	[M+H]+	L-(-)-Threonine	Amino acids and derivatives	72-19-5	4470300	2575100	2443900	5460200	2317800	4811000	2641900	5064500	2651700	3784900	4890700	2289000	733960	1076300	2383000
mws0232	377	243	376.12	C17H20N4O6	[M+H]+	Riboflavin	Others	83-88-5	190580	109750	160560	122540	608510	243190	119140	138590	92574	111320	127120	115950	135510	117830	124320
mws0236	124	80	125.008	C2H7NO3S	[M-H]-	2-Aminoethanesulfonic acid	Organic acids	107-35-7	14186	18814	19374	10645	10872	15446	32048	9181	19491	10345	9	9708.6	9	18228	25164
mws0237	187.1	125	188.093	C9H16O4	[M-H]-	Anchoic Acid	Organic acids	123-99-9	125550	104410	91600	274760	199310	138370	601340	152450	154140	125850	146580	182000	753960	651200	582220
mws0242	173.1	111	174.078	C8H14O4	[M-H]-	SubericAcid	Organic acids	505-48-6	8922.7	9	11056	17135	9	6731.2	29894	12077	9	14486	13870	9458.9	40498	23685	21551
mws0248	243.1	110	244.058	C9H12N2O6	[M-H]-	Uridine	Nucleotides and derivatives	58-96-8	148710	70668	90864	520220	332970	468060	450940	480810	137330	222510	154930	251270	91059	103500	77732
mws0250	182.1	136.1	181.065	C9H11NO3	[M+H]+	L-(-)-Tyrosine	Amino acids and derivatives	60-18-4	27070000	25543000	26997000	23676000	23578000	18876000	19371000	24796000	6832800	23606000	21891000	7447100	2268700	4815000	3662400
mws0254	156.1	110	155.061	C6H9N3O2	[M+H]+	L-Histidine	Amino acids and derivatives	71-00-1	3979400	5415100	4691600	9066600	5246200	8254600	4600800	6260500	5287400	5028900	5294400	1320400	448290	828590	1510500
mws0255	112	95	111.038	C4H5N3O	[M+H]+	Cytosine	Nucleotides and derivatives	71-30-7	62524	63732	51678	88821	76032	78827	187400	136280	104730	81468	76077	118590	62779	91257	80951
mws0256	118.1	72.1	117.07	C5H11NO2	[M+H]+	L-Valine	Amino acids and derivatives	72-18-4	53017000	30774000	45266000	5987900	8093600	6027600	9092700	9989800	6367900	9494600	14666000	5055000	5186600	6594100	6697800
mws0258	132	86	131.085	C6H13NO2	[M+H]+	L-Isoleucine	Amino acids and derivatives	73-32-5	66147000	66595000	63369000	8146000	15493000	9911300	20146000	16350000	10515000	13958000	16250000	8094700	9528400	17723000	16333000
mws0260	175	116	174.1	C6H14N4O2	[M+H]+	L-(+)-Arginine	Amino acids and derivatives	74-79-3	7220800	16289000	12897000	9016200	7411800	6218900	5262200	13503000	9941700	14001000	6716500	5680200	9512200	17628000	22214000
mws0262	149	87	150.009	C4H6O6	[M-H]-	L-(+)-Tartaric acid	Organic acids	87-69-4	67494	63052	61386	40858	55747	52096	70746	45539	72742	67058	58230	77154	54082	40468	48261
mws0264	341	119	342.096	C12H22O11	[M-H]-	D-(+)-TrehaloseAnhydrous	Others	99-20-7	5501800	5343800	4877700	7101000	5081100	6847400	4674800	4960700	6203800	5204300	5669200	5152600	1831900	1702800	2421300
mws0275	133	71	134.015	C4H6O5	[M-H]-	L-(-)-Malic acid	Organic acids	636-61-3	59062000	27114000	42557000	74064000	63532000	59825000	60381000	66699000	70599000	61414000	59707000	60511000	69679000	51458000	35497000
mws0277	191	85	192.053	C7H12O6	[M-H]-	Kinic acid	Organic acids	77-95-2	1652900	1242200	1939100	727670	905310	794470	462140	725600	776660	1513700	1187400	507670	1523000	1315300	1052300
mws0281	191	111	192.018	C6H8O7	[M-H]-	Citric Acid	Organic acids	77-92-9	21675000	13982000	18692000	17877000	15960000	16514000	12837000	12513000	9149300	11164000	4357200	8707600	15580000	10403000	4633900
mws0289	478.1	281.3	479.268	C23H46NO7P	[M-H]-	LysoPE 18:1	Lipids	89576-29-4	1609600	294470	654560	150400	369750	70528	1193700	402000	134130	462270	278950	175240	229890	276570	203010
mws0340	143	111	144.035	C6H8O4	[M-H]-	2,3-Dimethylsuccinic acid	Amino acids and derivatives	13545-04-5	4421.9	1314.6	6000.1	12651	20558	11131	17283	13265	28459	10138	8464.6	12479	16449	19944	10006
mws0341	131.08	85	132.07	C6H12O3	[M-H]-	(S)-(-)-2-Hydroxyisocaproic acid	Organic acids	13748-90-8	169910	173790	184770	112630	320590	106510	145470	44017	101280	137750	99362	54043	78689	84621	85922
mws0344	165.05	75	166.038	C5H10O6	[M-H]-	D-Xylonic acid	Organic acids	526-91-0	14003000	12121000	12536000	13433000	8992900	5354500	11217000	13920000	15266000	7611000	5294800	9017100	4418300	4724100	4204900
mws0351	457.08	169.02	458.068	C22H18O11	[M-H]-	Gallate catechin gallate	Flavonoids	4233-96-9	641790	559190	578480	534800	593980	909070	1121000	1835100	1455200	3658600	4832500	2757700	6612100	6148000	5961300
mws0359	241.22	241.218	242.205	C15H30O2	[M-H]-	Pentadecanoic Acid	Lipids	1002-84-2	9759.9	8466.4	9791.9	8392.5	8067.5	9248.4	9256.5	11965	8202.7	11792	17414	9326.3	19144	14851	9340.5
mws0362	269.24	269.24	270.234	C17H34O2	[M-H]-	Margaric Acid	Lipids	506-12-7	9	9	9	9	30448	9	1262400	9	9	20599	9	9	29534	9	9
mws0366	277.22	277.219	278.205	C18H30O2	[M-H]-	γ-Linolenic Acid	Lipids	506-26-3	1329700	1117300	1137500	4184300	12997000	4652100	14172000	4389500	10553000	3379600	2589700	4243900	12429000	13901000	14974000
mws0376	115	71	116.006	C4H4O4	[M-H]-	Fumaric acid	Organic acids	110-17-8	9	14479	9	9	136500	9	100680	81824	55016	46524	51118	9	123080	138900	108050
mws0380	341.11	101.03	342.116	C12H22O11	[M-H]-	Lactose	Others	63-42-3	1054600	889950	690730	1016700	797540	1261100	720330	972920	1452000	791930	826910	820410	549550	448160	455760
mws0396	281.25	281.248	282.234	C18H34O2	[M-H]-	Elaidic Acid	Lipids	112-79-8	2717100	3253500	1868700	1710200	1723100	1710900	24816000	1901600	722830	696650	799540	765060	509860	590940	763870
mws0425	129	85	130.021	C5H6O4	[M-H]-	Citraconic acid	Organic acids	498-23-7	65069	36863	104270	172710	352290	140520	185150	139090	239220	124150	136390	196360	164860	136270	104170
mws0438	151.15	59	152.058	C5H12O5	[M-H]-	L-Arabitol	Others	7643-75-6	9	9	9	9	9	9	50431	9	9	9	9	9	37326	42145	28244
mws0458	151.05	136	152.041	C8H8O3	[M-H]-	Vanillin	Phenolic acids	121-33-5	61983	94642	79208	224130	199860	160720	310560	467090	176920	216030	154280	184670	1125000	681540	469590
mws0470	117.02	73	118.021	C4H6O4	[M-H]-	Methylmalonic acid	Organic acids	516-05-2	36916000	27701000	30817000	11394000	28651000	18762000	17386000	14013000	14345000	20383000	14014000	23886000	30125000	33421000	21323000
mws0473	131.04	87	132.035	C5H8O4	[M-H]-	2-Methylsuccinic acid	Organic acids	498-21-5	3441700	2242300	2851100	525520	588000	526440	923930	913720	741240	717490	541960	983950	868020	851240	685030
mws0520	224.1	136	223.074	C11H13NO4	[M+H]+	N-Acetyl-L-tyrosine	Amino acids and derivatives	537-55-3	29536	7345.8	19807	49242	35210	23132	88609	48614	10123	27013	31842	16826	12687	37847	15072
mws0567	146.09	87	145.076	C5H11N3O2	[M+H]+	4-Guanidinobutyric acid	Organic acids	463-00-3	223440	142310	205530	254700	222470	220580	434440	385950	337980	350270	270810	357150	467570	465980	323950
mws0572	126.1	109	125.052	C5H7N3O	[M+H]+	5-Methylcytosine	Nucleotides and derivatives	554-01-8	10345	9487.5	10249	11929	20695	6367.9	13861	20806	8170.1	10141	7526.6	14188	19611	18504	16747
mws0576	103.05	59.1	104.041	C4H8O3	[M-H]-	3-Hydroxybutyrate	Organic acids	300-85-6	1157500	1550700	1174500	1197300	1719700	2265500	2011900	1698100	1239100	1177400	1907100	755270	791460	2393400	881960
mws0582	322.4	130	321.082	C11H19N3O6S	[M+H]+	S-(methyl)glutathione	Amino acids and derivatives	2922-56-7	191700	281030	217480	161840	166480	236250	91220	120630	40076	78211	74260	35782	10606	15085	28976
mws0596	154.04	136.04	153.036	C7H7NO3	[M+H]+	3-Hydroxyanthranilic acid	Organic acids	548-93-6	28153	10819	23772	22676	12811	4972.6	13208	17431	33407	12623	8413.5	6439.4	17948	9	9
mws0609	344.2	150	345.033	C10H12N5O7P	[M-H]-	Guanosine 3',5'-cyclic monophosphate	Nucleotides and derivatives	7665-99-8	9	9	13007	83157	66457	48265	94180	143100	135900	195870	125500	205660	248760	194360	170230
mws0612	195.07	121	196.064	C10H12O4	[M-H]-	3,4-Dimethoxyphenyl acetic acid	Organic acids	93-40-3	9	9	9	2940.2	8856	9	28628	8999.5	5887.8	6397.9	9	5271.9	129640	73487	25730
mws0628	121.04	92	122.032	C7H6O2	[M-H]-	4-Hydroxybenzaldehyde	Phenolic acids	123-08-0	215180	231160	183750	207060	236790	230350	342670	389480	135830	168660	171560	165120	659840	438720	335140
mws0629	281.3	166	280.092	C13H16N2O5	[M+H]+	Asp-phe	Amino acids and derivatives	13433-09-5	187100	193670	205930	408330	422070	338930	400620	402790	666920	413590	410900	500890	386630	374730	340260
mws0636	313.4	166	312.132	C18H20N2O3	[M+H]+	Phe-Phe	Amino acids and derivatives	2577-40-4	22720	12681	20670	9	4592.9	9	15134	4304.9	9	9	3582.6	9	5826.8	10522	6195.8
mws0639	153.2	109	154.021	C7H6O4	[M-H]-	2,3-Dihydroxybenzoic Acid	Organic acids	303-38-8	175460	115950	136390	224790	677740	106700	866600	394220	329640	316520	167560	345040	3013600	2355200	2566600
mws0668	283	151	284.063	C10H12N4O6	[M-H]-	Xanthosine	Nucleotides and derivatives	146-80-5	102710	58324	78395	15437	70990	19575	92887	102030	69337	38961	23472	39604	119670	129460	71557
mws0671	120.1	74.1	119.05	C4H9NO3	[M+H]+	L-Homoserine	Organic acids	672-15-1	2465200	1723500	2684400	2904000	3545300	3807500	3272400	3199000	3466100	1811100	2425300	1091100	931730	1262200	1395000
mws0675	335.1	123	334.041	C11H15N2O8P	[M+H]+	β-Nicotinamide mononucleotide	Nucleotides and derivatives	1094-61-7	2168300	535870	1411600	3468700	2110500	1704300	1266700	1731100	946020	2570400	1105500	3670300	461570	558410	420390
mws0724	298.1	208	299.072	C10H13N5O6	[M-H]-	8-Hydroxyguanosine	Nucleotides and derivatives	3868-31-3	22603	16124	19297	21878	15475	19862	15043	17178	7308.1	5769.7	7702.8	9	31805	15641	12478
mws0736	189.1	86	188.103	C8H16N2O3	[M+H]+	N-Glycyl-L-leucine	Amino acids and derivatives	869-19-2	7065600	7123600	9272200	21444	123500	45320	708830	252450	44643	61205	22240	87829	83982	170550	68579
mws0744	319.05	301	320.041	C15H12O8	[M-H]-	Dihydromyricetin(Ampelopsin)	Flavonoids	27200-12-0	6254500	8236200	9012800	410500	646160	381670	979460	575110	1964900	1587100	1020000	2291200	690350	1151600	1478300
mws0748	353.1	191.1	354.079	C16H18O9	[M-H]-	1-Caffeoylquinic acid	Phenolic acids	1241-87-8	7755.5	9	9	9	14321	15763	16099	27265	23658	34986	36819	44347	540800	298670	171560
mws0752	185.16	185.156	186.147	C11H22O2	[M-H]-	Undecylic Acid	Lipids	112-37-8	1808500	1747100	1804300	1612000	1610300	1767200	1620200	1771600	1632300	1754900	1655100	1750800	1645900	1571000	1535000
mws0813	128	82	129.036	C5H7NO3	[M-H]-	5-Oxoproline	Amino acids and derivatives	149-87-1	17998	19290	18904	7054.9	5278.5	11215	17528	10971	11108	6682.5	6059	5923.8	11428	10947	7457.6
mws0836	577.14	425.1	578.142	C30H26O12	[M-H]-	Procyanidin B1	Tannins	20315-25-7	3204800	2829300	2445800	7151800	6405300	7250400	7383900	9278500	7763100	4266000	4924000	4536300	1477300	1735600	3032300
mws0847	150	133	149.063	C6H7N5	[M+H]+	1-Methyladenine	Nucleotides and derivatives	5142-22-3	110350	106840	117220	34193	41166	32192	31132	61025	39209	40743	36390	47515	33973	47594	36470
mws0851	143.11	143.109	166.086	C8H15NaO2	[M-Na]-	Sodium Valproate	Organic acids	1069-66-5	1973900	2206300	1940400	1795000	2068300	1595200	1596100	2019900	2205800	2002100	1923600	1934900	1293700	1132900	1120500
mws0853	209	179	210.078	C11H14O4	[M-H]-	Sinapyl alcohol	Phenolic acids	537-33-7	47096	24626	54952	13990	49230	7218.3	20751	23573	35872	30508	22237	45654	177680	157320	74187
mws0856	463	301	464.076	C21H20O12	[M-H]-	Spiraeoside	Flavonoids	20229-56-5	668270	560190	726290	3518100	4557200	4305700	3583200	2198600	14948000	3905600	2402800	6844100	1352300	930980	1214300
mws0863	213	97	234.988	C5H9NaO7P	[M-Na]-	2-Deoxyribose 5-phosphate	Nucleotides and derivatives	102916-66-5	9	9	9	43180	61234	30299	70782	72762	41414	54051	31334	38352	70162	200860	352350
mws0866	259	97	260.016	C6H13O9P	[M-H]-	D-Glucose 6-phosphate	Others	56-73-5	1151900	659460	615780	644380	812330	501750	905050	1706200	966930	867880	875600	896980	1321100	826480	940560
mws0875	179	76	178.032	C5H10N2O3S	[M+H]+	Cys-Gly	Amino acids and derivatives	19246-18-5	25032	29332	34697	25079	4904.5	15844	5773.8	4478.5	38645	11251	26662	16701	4767.8	2426	1010.1
mws0884	328.1	134.2	329.038	C10H12N5O6P	[M-H]-	Cyclic AMP	Nucleotides and derivatives	60-92-4	9	9	14589	36945	41969	19918	51701	70598	52010	75195	42887	96990	81894	89115	72587
mws0885	153	109	154.021	C7H6O4	[M-H]-	2,4-Dihydroxy benzoic acid	Phenolic acids	89-86-1	244810	121840	160150	296220	664140	145610	1007600	425540	381290	351480	154290	387660	3343300	2545800	2653300
mws0889	135	75.01	136.029	C4H8O5	[M-H]-	Threonate	Others	70753-61-6	254870	100510	173810	435870	386520	511340	312820	212910	562670	579960	345810	638520	883610	667800	695180
mws0890	104.03	74.02	105.036	C3H7NO3	[M-H]-	D-Serine	Amino acids and derivatives	312-84-5	25494	18062	18217	13417	9557.2	13228	15021	9814.1	18165	14033	13568	6347.5	3250.3	3938.4	7251.6
mws0895	431	269	432.088	C21H20O10	[M-H]-	Genistein 7-Glucoside(Genistin)	Flavonoids	529-59-9	1821500	2446300	1804100	874140	827730	1401200	411860	976130	194070	708700	1070500	327340	12434	13340	27775
mws0906	341	179	342.113	C16H22O8	[M-H]-	Coniferin	Phenolic acids	531-29-3	2852100	483200	1970300	1688100	4873500	2963600	2454800	5141000	2494100	3773100	1441200	8338700	1411800	1364300	1882800
mws0914	271	151	272.058	C15H12O5	[M-H]-	Pinobanksin	Flavonoids	548-82-3	103540	80818	106840	37227	46048	35722	26514	47343	60271	161070	75827	234790	33871	44603	35400
mws0920	301	151	302.033	C15H10O7	[M-H]-	Tricetin	Flavonoids	520-31-0	198450	83162	91612	50357	77672	120040	83621	153100	127210	104920	121650	149210	243380	141620	106080
mws0924	145.06	101	146.049	C6H10O4	[M-H]-	2-Methylglutaric acid	Organic acids	617-62-9	124200	48342	72037	30034	75022	59544	110180	97310	69252	67203	34703	93666	223320	165870	131590
mws0983	326.31	62.065	325.272	C20H39NO2	[M+H]+	N-Oleoylethanolamine	Others	111-58-0	207030	480510	332610	1242300	950910	587410	501480	469290	588500	636300	279930	833220	438900	360740	342850
mws1000	287	149	288.053	C15H12O6	[M-H]-	Fustin	Flavonoids	20725-03-5	59310	75276	35911	370900	345580	373450	337190	275320	343070	291500	203580	333550	500680	433330	354480
mws1003	331	151	332.041	C16H12O8	[M-H]-	Laricitrin	Flavonoids	53472-37-0	9	9	9	9	14580	9	13456	9	9	10844	6265	14227	423970	292300	243990
mws1014	209.2	149.1	208.029	C10H8O5	[M+H]+	Fraxetin	Lignans and Coumarins	574-84-5	279270	401300	426110	101660	245500	297310	368900	358360	491790	170320	365030	31596	364060	79270	31586
mws1050	148.05	88	147.045	C5H9NO4	[M+H]+	O-Acetylserine	Amino acids and derivatives	5147-00-2	1379500	1709200	2012400	958210	2406400	2068700	1988500	1361700	3084700	1289000	1283200	1380500	808170	742770	670230
mws1060	267.08	135	268.068	C10H12N4O5	[M-H]-	9-(β-D-Arabinofuranosyl)hypoxanthine	Nucleotides and derivatives	7013-16-3	77708	17775	69610	56494	137290	59246	54133	69525	66413	29967	53205	39154	96837	69278	60274
mws1068	285.05	151	286.038	C15H10O6	[M-H]-	Kaempferol	Flavonoids	520-18-3	9	9	9	9	9	9	6446.9	9	9	9	9	9	24810	24264	31622
mws1080	341.1	179	342.096	C12H22O11	[M-H]-	Galactinol	Others	3687-64-7	45471000	43288000	42646000	51685000	45778000	50576000	40947000	33847000	51330000	42308000	44670000	40013000	15402000	13194000	19469000
mws1090	259	97	260.016	C6H13O9P	[M-H]-	Glucose-1-phosphate	Others	59-56-3	9	9	507160	9	1253200	579210	1012600	1376700	1207500	1340900	1246800	1348800	1028200	1025100	937720
mws1094	287.06	259	288.053	C15H12O6	[M-H]-	Dihydrokaempferol	Flavonoids	480-20-6	9	9	9	9	69862	9	25377	13691	9	16995	14454	18537	85646	110890	138140
mws1155	181.2	101.02	182.067	C6H14O6	[M-H]-	Mannitol	Others	87-78-5	3555.5	2457	9	1498.5	14274	9	98485	9	3402.5	9	9	2640.4	21454	62591	101530
mws1189	193.1	72.795	194.033	C6H10O7	[M-H]-	D-Galacturonic acid(Gal A)	Organic acids	91510-62-2	520530	330070	427450	327850	660470	310930	569210	646310	384730	506170	338550	713640	318860	468150	351820
mws1195	179.1	147.1	178.055	C10H10O3	[M+H]+	Methyl p-coumarate	Phenolic acids	3943-97-3	10458	6189.1	9425.1	7861.5	187170	6497.9	218400	13342	16058	57343	13739	53543	47702	45466	51181
mws1200	177	145	178.055	C10H10O3	[M-H]-	Trans-4-Hydroxycinnamic Acid Methyl Ester	Phenolic acids	19367-38-5	13138	5628.8	14165	14256	288030	7204.5	350390	19708	21648	67177	19114	71483	56290	54473	70469
mws1212	209.1	177.3	208.064	C11H12O4	[M+H]+	Methyl ferulate	Phenolic acids	2309-07-01	2760.6	9	3660.3	12379	31082	2897.8	30546	15374	23758	34621	20031	47776	29288	41777	29380
mws1213	193.1	72.995	194.033	C6H10O7	[M-H]-	Aldehydo-D-galacturonate	Organic acids	685-73-4	565750	280260	420160	329090	537310	285930	578540	606470	501970	395370	290770	543550	200030	453950	325100
mws1333	341.12	113	342.096	C12H22O11	[M-H]-	Melibiose	Others	585-99-9	5435300	5065900	4715400	5900300	4785500	5065700	4404800	4241000	5499100	5012300	4340600	5154000	1688500	1536000	2055700
mws1336	138.05	120	137.042	C7H7NO2	[M+H]+	4-Aminobenzoic acid	Phenolic acids	150-13-0	9423	5247.5	6954.6	12269	22964	9	49379	71564	34027	38671	21403	23833	32050	49173	39837
mws1337	220.2	202.1	219.097	C9H17NO5	[M+H]+	D-Pantothenic Acid	Others	79-83-4	6863600	5547000	6482700	6324000	5669900	5939100	8806900	7644900	11177000	8004100	7083500	8414100	7930900	6693400	5454900
mws1350	181.06	151	182.049	C9H10O4	[M-H]-	Syringic Aldehyde	Phenolic acids	134-96-3	27567	46243	43681	92171	234780	50305	234190	427560	60744	94958	54778	71214	398660	291920	237390
mws1354	193.06	133.8	194.049	C10H10O4	[M-H]-	Trans-ferulic acid	Phenolic acids	537-98-4	9	9	9	9897.8	51446	7372.9	45023	27526	18711	18182	9	13086	62355	49911	24953
mws1361	449.1	151	450.096	C21H22O11	[M-H]-	Astilbin	Flavonoids	29838-67-3	1103900	4081300	2460800	621540	704850	740870	521980	426260	1075400	639790	882640	517610	67032	76241	100680
mws1392	139.04	98.9766	138.026	C7H6O3	[M+H]+	Sesamol	Lignans and Coumarins	533-31-3	5988	9	6536.1	14947	16176	16937	16314	12056	17351	18016	12054	28919	20445	21671	24076
mws1397	441.3	169	442.073	C22H18O10	[M-H]-	(-)-Epicatechin gallate	Flavonoids	1257-08-5	11314000	7496700	9735100	12367000	20983000	23216000	24856000	38459000	24584000	38904000	48021000	51325000	54543000	48576000	47018000
mws1401	175	84	174.089	C7H14N2O3	[M+H]+	L-theanine	Amino acids and derivatives	3081-61-6	7513.9	8509.9	7025.9	7925.5	12667	14482	28568	10692	5202.1	10240	7269.1	7022.9	9921.7	11089	4877.4
mws1434	431.11	311	432.088	C21H20O10	[M-H]-	Isovitexin	Flavonoids	29702-25-8	762410	777580	708690	302730	246790	374820	135970	254160	78525	200440	328400	83123	8662.5	12702	9751.9
mws1490	281.3	281.3	282.234	C18H34O2	[M-H]-	Oleic Acid	Lipids	112-80-1	104660	68776	95803	56352	76962	67112	745870	110660	48385	79667	93439	35401	72673	59463	33589
mws1499	149.05	59.0131	150.044	C5H10O5	[M-H]-	D-(-)-Arabinose	Others	10323-20-3	212930	180260	157950	256670	220490	208300	269530	202120	411990	172240	112000	289080	115120	150900	138330
mws1521	285.1	121	286.09	C13H18O7	[M-H]-	Salicin	Phenolic acids	138-52-3	819440	437130	562880	338550	459360	541860	451320	668270	542680	455730	221440	502290	395270	441130	561100
mws1550	162.1	73.1	161.042	C6H11NO2S	[M+H]+	S-Allyl-L-cysteine	Amino acids and derivatives	21593-77-1	297270	1345800	865340	9	9	9	9	9	9	9	9	9	9	9	9
mws1570	132.07	73	131.05	C5H9NO3	[M+H]+	Cis-4-Hydroxy-D-proline	Amino acids and derivatives	2584-71-6	9	9	9	9	9	9	1679100	9	9	9	9	23234	9	9	9
mws1584	515.12	191	516.105	C25H24O12	[M-H]-	Cynarin	Phenolic acids	30964-13-7	26434	18626	23781	33551	22058	24877	29487	45931	33374	54456	38394	63247	117520	80550	85118
mws1587	132.1	86	131.085	C6H13NO2	[M+H]+	α-Aminocaproic acid	Amino acids and derivatives	327-57-1	69644000	67468000	67865000	10014000	18158000	11254000	23569000	18769000	11237000	16235000	18503000	10110000	10601000	20030000	17828000
mws1589	503.2	179	504.14	C18H32O16	[M-H]-	Panose	Others	33401-87-5	31187	124910	103550	47219	61656	80889	30024	53628	82567	50478	46644	100440	50324	48736	56605
mws1610	471.38	471.38	472.355	C30H48O4	[M-H]-	Maslinic acid	Terpenoids	4373-41-5	2794500	492410	1200700	7644900	4585600	2978400	6049900	7166400	5216900	4215500	4113200	3322000	4207100	3308600	4256100
mws1706	148.1	84	147.045	C5H9NO4	[M+H]+	Glutamic acid	Amino acids and derivatives	617-65-2	55031000	40705000	53747000	36252000	43100000	53456000	31974000	32645000	29028000	36287000	44363000	28808000	23943000	29545000	30653000
mws1711	118.15	55.1	117.07	C5H11NO2	[M+H]+	D-(-)-Valine	Amino acids and derivatives	640-68-6	30221000	14597000	24588000	2540600	3466700	2459700	4001100	4057100	2881000	3985400	6719600	2118000	2214000	2816700	3008400
mws1712	166.19	77	165.07	C9H11NO2	[M+H]+	D-(+)-Phenylalanine	Amino acids and derivatives	673-06-3	21229000	10518000	18332000	16106000	12435000	10250000	14382000	20145000	5952700	12306000	19173000	4554600	2237100	3145100	2944100
mws2118	435.13	166.7	436.116	C21H24O10	[M-H]-	Phloretin 2'-O-glucoside	Flavonoids	60-81-1	24359000	15428000	18350000	23916000	20968000	20072000	19106000	24018000	20473000	18103000	22368000	19501000	14098000	17456000	17132000
mws2125	166.97	78.7	205.931	C3H4KO6P	[M-K]-	Phosphoenolpyruvic acid	Organic acids	4265-07-0	27071	57914	24870	86869	198230	296590	240040	435310	350710	157780	460640	62722	628490	582320	412310
mws2186	435.08	303	434.068	C20H18O11	[M+H]+	Avicularin	Flavonoids	572-30-5	138930	162200	182450	341570	474790	352670	337770	349190	836430	907970	554430	1545100	443400	344490	360530
mws2209	447.1	285	448.082	C21H20O11	[M-H]-	Astragalin (Kaempferol 3-O-Glucoside)	Flavonoids	480-10-4	9	9	9	451550	456210	293910	890970	9	1429300	3657700	1271900	6431600	839870	520000	572820
mws2212	179.04	135	180.035	C9H8O4	[M-H]-	Caffeic acid	Phenolic acids	331-39-5	59196	22282	52487	88005	1914800	72357	222030	106840	126460	76341	59002	113680	180680	343040	226690
mws2213	147.05	77.01	148.046	C9H8O2	[M-H]-	Cinnamic acid	Phenolic acids	140-10-3	3982.2	3822.3	2853.6	2188.8	14937	1796.6	8902	23821	35596	5695.7	9	18226	5230.1	4984.5	3594.1
mws2220	457.08	169.02	458.068	C22H18O11	[M-H]-	Gallocatechin 3-O-gallate	Flavonoids	5127-64-0	874130	661410	861300	538140	562020	627590	1609100	1867700	2217900	2862400	4097800	3975000	6586500	6338900	6459600
mws2221	441.08	169.02	442.073	C22H18O10	[M-H]-	Catechin gallate	Flavonoids	130405-40-2	10370000	10028000	12945000	20202000	23673000	27809000	26214000	41140000	36770000	55591000	49720000	57791000	52792000	56089000	54932000
mws2523	421.1	241.1	422.06	C12H23O14P	[M-H]-	Trehalose 6-phosphate	Others	4484-88-2	1333500	819720	907020	944980	471350	412060	526440	763190	264590	172760	382650	216650	149090	201960	486100
mws2623	281.25	281.25	282.234	C18H34O2	[M-H]-	11-Octadecanoic acid(Vaccenic acid)	Lipids	506-17-2	899250	1018200	717340	477580	657370	625590	11216000	571120	224370	131710	256710	255570	203280	220640	241200
mws2628	118.09	87.0457	117.07	C5H11NO2	[M+H]+	N-Methyl-4-aminobutyric acid	Organic acids	1119-48-8	2641.8	1031.7	1473.2	1899.2	4887.1	1314.3	1485.5	1215.1	1081.2	1630.7	1209.3	1646.2	1629.4	796.11	1333.5
mws4134	611.15	306.079	612.121	C20H32N6O12S2	[M-H]-	Oxidized Glutathione	Amino acids and derivatives	121-24-4	1057500	1641100	1096200	344480	313650	814520	256020	268840	786680	664170	580810	706500	285440	197590	157070
mws4170	179.06	59.0139	180.053	C6H12O6	[M-H]-	D-Glucose	Others	14431-43-7	3666500	2938700	3387600	5854100	9343900	4511700	8341200	4762500	15325000	9123700	6790900	10460000	1928400	1864400	2120900
mws4175	175.03	85.0288	176.024	C6H8O6	[M-H]-	D-Glucurono-6,3-lactone	Others	32449-92-6	88174	50424	41757	47035	41435	29880	29434	47419	85736	48592	92330	271140	100980	78647	82209
mws4176	237.12	120.088	236.103	C12H16N2O3	[M+H]+	DL-Alanyl-DL-phenylalanine	Amino acids and derivatives	1999-45-7	304240	304440	347330	7346.2	51076	10409	161020	30357	13285	11660	10261	24571	18962	91679	36902
mws5035	279.17	120.085	278.147	C15H22N2O3	[M+H]+	Leucylphenylalanine	Amino acids and derivatives	56217-82-4	2527700	2333700	2637100	52251	189150	50230	1075200	77934	80741	57931	53328	72874	122840	359260	158500
mws5037	203.14	86.101	202.118	C9H18N2O3	[M+H]+	Alanylleucine	Amino acids and derivatives	1999-42-4	24162	15218	23634	49413	69606	36371	41653	25347	70848	69372	71436	98246	14549	10852	14902
mws5038	341.11	89.0249	342.096	C12H22O11	[M-H]-	Isomaltulose	Others	13718-94-0	8802800	7935900	7507300	14024000	9711600	10250000	9069500	7648700	10823000	7491800	8039200	9119400	2040900	2424700	2782000
mws5040	365.11	203.053	364.078	C12H21O11Na	[M+H]+	Turanose	Others	547-25-1	8992300	8878100	9364600	17705000	25020000	17163000	26421000	25906000	22070000	25182000	24697000	21372000	10548000	10870000	11642000
mws5041	189.12	86.1038	188.103	C8H16N2O3	[M+H]+	Glycylisoleucine	Amino acids and derivatives	19461-38-2	4129300	4089400	5686000	16076	82409	22146	383980	130780	28751	36367	14468	53559	47053	112800	34341
mws5042	223.11	120.088	222.089	C11H14N2O3	[M+H]+	Glycylphenylalanine	Amino acids and derivatives	721-66-4	13604000	11401000	13108000	53027	108520	37935	523350	122080	59122	68696	36394	74000	79285	211390	92613
pmb0149	351	147.1	350.222	C21H34O4	[M+H]+	MAG(18:4)isomer1	Lipids	-	1318.3	9	9	31549	44737	33485	4210.6	16572	64643	63320	40430	46437	202310	297990	451250
pmb0160	353.3	261.1	352.237	C21H36O4	[M+H]+	MAG(18:3)isomer5	Lipids	-	53650	32948	49768	2504400	3454200	1844500	5253500	1099900	5370300	1974000	1531500	1839000	2825000	5310600	6108400
pmb0164	355.1	147.2	354.251	C21H38O4	[M+H]+	MAG(18:2)isomer1	Lipids	-	68585	57986	71428	585380	699160	439190	956810	237620	959900	334950	303690	301060	203490	362460	369180
pmb0287	351.4	334.3	350.222	C21H34O4	[M+H]+	MAG(18:4)isomer2	Lipids	-	16792	13629	13498	6195.8	13730	19195	21467	32708	30669	26626	10916	31408	31973	27573	32031
pmb0296	357.2	265.4	356.265	C21H40O4	[M+H]+	MAG(18:1)isomer2	Lipids	-	224990	406610	351790	4076600	5080700	3199500	7066200	1751100	4999600	2452600	2915000	2084700	445080	913340	917340
pmb0374	136.1	118.9	135.049	C5H5N5	[M+H]+	Aminopurine	Alkaloids	452-06-2	12178	3845.9	7989.3	73004	51656	63833	39864	49821	27808	64679	30646	140370	43706	54381	47213
pmb0542	535.11	287.5	535.109	C24H23O14+	[M]+	Cyanidin 3-O-(6''-Malonylglucoside)	Flavonoids	171828-62-9	334450	229440	191130	13717	47257	41346	67138	85418	38963	47585	27353	8885.8	9	6491.8	10021
pmb0550	449.11	287.3	449.108	C21H21O11+	[M]+	Cyanidin 3-O-glucoside (Kuromanin)	Flavonoids	47705-70-4	37964000	23309000	37118000	28582000	21788000	14577000	16920000	32102000	10882000	40684000	36647000	61198000	12723000	25883000	38864000
pmb0563	301.07	286	301.071	C16H13O6+	[M]+	Peonidin	Flavonoids	134-01-0	9	7979.4	7927.4	2017.6	3115.5	3987.6	1401.5	6340.1	8897.7	9	3197.1	2096.9	9	1214.3	9
pmb0660	757.2	147.1	756.158	C36H36O18	[M+H]+	C-Hexosyl-luteolin O-p-coumaroylhexoside	Flavonoids	-	72950	63631	61115	28298	41860	59771	38808	68999	30544	34720	23056	45670	53958	31994	28058
pmb0680	741.2	147.3	740.163	C36H36O17	[M+H]+	C-Hexosyl-apigenin O-p-coumaroylhexoside	Flavonoids	-	16229	8011.2	12927	10416	18093	17115	13819	19395	9785.3	19701	6989.3	21721	18872	11063	11491
pmb0736	493.1	331	492.105	C23H24O12	[M+H]+	Tricin 7-O-hexoside	Flavonoids	-	3236900	3022300	3748200	3470600	4117400	5382500	3076500	4333600	3791800	5887900	8327000	5531700	1694100	1617000	1241700
pmb0764	144.1	113.2	143.033	C6H9NOS	[M+H]+	4-Methyl-5-thiazoleethanol	Others	137-00-8	14750	5373.6	12622	20576	51344	20817	18971	24409	19907	31486	26970	26378	95421	137130	95070
pmb0767	302.4	60.2	301.272	C18H39NO2	[M+H]+	D-erythro-Dihydrosphingosine	Lipids	764-22-7	8497.8	5781.1	6752	12526	10078	5658.1	28616	9937.2	14967	12449	5504.5	12259	29507	18533	28333
pmb0801	346	184.1	345.089	C14H19NO9	[M+H]+	4-Pyridoxic acid O-hexoside	Others	-	29812	26577	29627	61830	62364	63536	55025	66442	78067	67268	80229	79891	96103	102520	121710
pmb0854	518.3	184.08	517.282	C26H48NO7P	[M+H]+	LysoPC 18:3	Lipids	-	221590	69624	146280	1499000	5308700	464680	23637000	5098000	12438000	6116900	2595800	7136800	21467000	30085000	22610000
pmb0855	496.3	184.2	495.296	C24H50NO7P	[M+H]+	LysoPC 16:0	Lipids	17364-16-8	11107000	2597600	6581200	3216500	6924200	2894700	6998200	4443700	2386500	4333900	4156500	3296800	5827300	5230900	3745400
pmb0856	480.31	339.2	479.268	C23H46NO7P	[M+H]+	LysoPE 18:1(2n isomer)	Lipids	-	4883300	1755800	3233400	1073400	2301200	391680	17060000	3649300	2300500	4155900	1917100	1659100	3560400	9265100	3372300
pmb0863	492.3	184	491.268	C24H46NO7P	[M+H]+	LysoPC 16:2(2n isomer)	Lipids	-	39048	18167	27108	16697	50595	8015.4	201180	27797	38120	29256	31499	19654	107510	146890	70069
pmb0864	426.3	285.2	425.224	C19H40NO7P	[M+H]+	LysoPE 14:0	Lipids	-	37585	15354	22271	5536.8	10972	2608.5	29294	7489.1	7693.2	15169	14242	14115	33036	33956	20233
pmb0865	518.2	184.1	517.282	C26H48NO7P	[M+H]+	LysoPC 18:3(2n isomer)	Lipids	-	161160	51446	107490	1180000	4233200	343990	19905000	3718600	10127000	4906100	2046300	5398400	19000000	27822000	19411000
pmb0874	478.6	460.6	477.253	C23H44NO7P	[M+H]+	LysoPE 18:2(2n isomer)	Lipids	-	461980	49803	188050	42039	161000	23240	451950	119100	77791	117190	83087	78002	131040	189120	123990
pmb0876	454.2	313.3	453.253	C21H44NO7P	[M+H]+	LysoPE 16:0	Lipids	53862-35-4	2780800	329260	1138400	269430	942770	166770	1357900	886980	496450	879100	692170	656410	1196500	1090200	989630
pmb0889	279.3	95.1	278.205	C18H30O2	[M+H]+	Punicic acid	Lipids	544-72-9	1161000	866320	1034300	673890	1537500	2134200	8984900	916490	503430	564550	624170	493560	584510	536880	492740
pmb0890	355.1	263.3	354.251	C21H38O4	[M+H]+	MAG(18:2)	Lipids	-	281390	218440	251660	419250	919220	686950	5164400	386570	397930	422240	449200	229110	189770	258660	199170
pmb0981	348.2	136	347.047	C10H14N5O7P	[M+H]+	Adenosine 5'-monophosphate	Nucleotides and derivatives	61-19-8	3793100	1160500	2637600	2130800	1463400	839250	1601700	1627400	1565500	3485000	1209100	5253500	2145800	2404700	2220000
pmb0998	364.1	152.1	363.042	C10H14N5O8P	[M+H]+	Guanosine 5'-monophosphate	Nucleotides and derivatives	85-32-5	295810	61790	194420	65051	79314	31611	87214	55816	70607	107580	44388	185950	110120	99583	91541
pmb1605	353.3	261.4	352.237	C21H36O4	[M+H]+	MAG(18:3)isomer3	Lipids	-	3588.4	6657.5	1762	149650	147440	107910	218430	212670	320060	213090	183030	233910	499460	1145500	1196500
pmb1656	353.1	335.1	352.237	C21H36O4	[M+H]+	MAG(18:3)isomer4	Lipids	-	1235.4	1092	517.66	4178.6	8136.1	4585.7	14474	2571.2	13035	3261.1	3175.7	4577.7	9689.4	16249	11780
pmb1912	474.2	327	473.144	C20H23N7O7	[M+H]+	10-Formyl-THF	Alkaloids	2800-34-2	55566	64757	75557	414390	460810	463890	644020	492120	1277200	774750	589670	1161800	2598400	2136900	1835800
pmb2211	343.1	240.7	342.262	C19H38N2O3	[M+H]+	Cocamidopropyl βine	Alkaloids	4292-10-08	10966	11306	12478	22202	37327	24332	28670	28444	31967	23579	18491	17368	60415	60208	46981
pmb2221	318.3	60.1	317.266	C18H39NO3	[M+H]+	4-Hydroxysphinganine	Lipids	554-62-1	219630	207520	194290	184230	203110	99777	1022100	241210	307790	364340	207190	465260	629800	474380	618300
pmb2319	482.3	184.1	481.282	C23H48NO7P	[M+H]+	LysoPC 15:0	Lipids	-	44493	15648	29174	47152	95392	15293	182230	56851	89094	77544	42204	100630	288150	236910	176500
pmb2325	353.1	261.8	352.237	C21H36O4	[M+H]+	MAG(18:3)isomer2	Lipids	-	4877.2	4669.1	5674.8	143440	190850	74314	367140	75736	381800	149830	104490	117690	275670	473950	579530
pmb2363	357.2	265.3	356.265	C21H40O4	[M+H]+	MAG(18:1)isomer1	Lipids	-	290550	425280	421850	4373500	6092000	3682700	8128000	2264800	5590200	2850300	3043100	2547300	541660	1018800	1042700
pmb2406	510.1	184.4	509.311	C25H52NO7P	[M+H]+	LysoPC 17:0	Lipids	-	14514	3128.4	8672.5	13610	22838	3096	25747	24148	10616	10688	7637.8	14219	46198	34463	30956
pmb2444	353.2	261.3	352.237	C21H36O4	[M+H]+	MAG(18:3)isomer1	Lipids	-	29609	31172	32305	76738	142750	149220	390270	183660	317200	131240	93405	169860	131620	165500	194050
pmb2591	245	203.2	246.089	C13H14N2O3	[M-H]-	Acetyltryptophan	Amino acids and derivatives	2280-01-05	27814	20536	40809	101210	207260	252860	147670	144790	88631	123020	70296	86091	20008	23434	26749
pmb2620	207.1	133.1	208.064	C11H12O4	[M-H]-	3,4-Dimethoxycinnamic acid	Phenolic acids	14737-89-4	2374.5	9	2950.4	4851.2	18019	1904	14801	8672	7186.7	15716	9524.5	21173	8055.1	6186.1	10179
pmb2640	199	181	200.162	C12H24O2	[M-H]-	Lauric acid	Lipids	143-07-7	2231.1	3460.9	3193.2	2082.9	3412.5	2205.6	11502	2163.4	2705.5	2678.1	1952.5	2805.9	3973	2925.3	3380.4
pmb2778	295	277.3	296.214	C18H32O3	[M-H]-	9,10-EODE	Lipids	65167-83-1	1709400	1560000	1530100	1097600	2422000	2717800	14693000	1328200	765620	915530	933150	789160	1022900	912400	867290
pmb2784	293.2	275.1	294.199	C18H30O3	[M-H]-	13-HOTrE	Lipids	87984-82-5	9	9	9	5390.7	5183.2	8814.6	4720.5	9084.6	3247.4	11062	6978.2	12765	72278	46156	69764
pmb2786	293	275	294.199	C18H30O3	[M-H]-	9-HOTrE	Lipids	89886-42-0	4355	5369.1	5351.6	10503	57134	7299.4	71397	21407	16447	13303	9824.6	14183	35090	41758	41145
pmb2792	293	193.1	294.199	C18H30O3	[M-H]-	13-HOTrE(r)	Lipids	74784-20-6	133910	121910	148900	148030	129920	123360	150630	142430	152470	183460	123290	158180	141730	126050	156280
pmb2799	295	195.2	296.214	C18H32O3	[M-H]-	12,13-EODE	Lipids	6799-85-5	164020	100540	130570	52343	212990	368450	5435800	65288	33583	91537	111840	83277	9	9508.8	10408
pmb2871	315.1	153	316.065	C13H16O9	[M-H]-	2,5-Dihydroxy benzoic acid O-hexside	Phenolic acids	-	9	66739	67144	216190	573520	1245600	9	1084200	688370	301760	220550	333770	447200	2099800	4432800
pmb2922	565.1	323.1	566.029	C15H24N2O17P2	[M-H]-	Uridine 5'-diphospho-D-glucose	Nucleotides and derivatives	133-89-1	3364800	4784300	3458900	812830	1805100	2704500	1934200	2408600	3284100	2616000	3841000	1810800	3269400	3275100	4341400
pmb2940	385.1	205	386.102	C17H22O10	[M-H]-	1-O-β-D-Glucopyranosyl sinapate	Phenolic acids	78185-48-5	10023	5616.6	12102	8445.5	11840	9	13574	107750	8790.9	10252	18487	12713	17758	27867	11846
pmb2947	865.1	407.1	866.172	C45H38O18	[M-H]-	Catechin-catechin-catechin	Tannins	-	198330	84695	90208	1796500	2244700	1676800	2703400	2888800	2052900	1383200	1203200	1664000	382040	1119100	1419000
pmb2957	465.08	285.1	467.098	C24H19O10+	[M-2H]-	Cyanidin O-syringic acid	Flavonoids	-	29106000	17053000	20899000	15010000	8520500	7492300	6046400	11418000	3431800	20800000	18437000	24723000	2795200	4947600	5874200
pmb2959	489.1	284.1	491.119	C23H23O12+	[M-2H]-	Cyanidin 3-O-(6''-Acetylglucoside)	Flavonoids	-	1556100	730270	1057700	38785	93425	183810	167460	290950	140650	98557	97639	16421	9	7857.1	14521
pmb3006	431.1	269.1	432.088	C21H20O10	[M-H]-	Apigenin 7-O-glucoside(Cosmosiin)	Flavonoids	578-74-5	1276500	902090	848200	1681000	1012100	1584900	958210	2081600	1110100	887870	1280000	819540	82661	96824	153360
pmb3013	519.1	314.2	520.1	C24H24O13	[M-H]-	Isorhamnetin O-acetyl-hexoside	Flavonoids	-	103580	96604	195750	264340	525950	685280	411810	281420	514750	210190	201580	280330	133940	76436	95853
pmb3045	505.1	329.1	506.085	C23H22O13	[M-H]-	Tricin O-glucuronic acid	Flavonoids	-	130630	70649	87965	66228	68431	54830	72211	93286	70993	81316	63842	98094	15850	10528	9
pmb3066	481.1	319.2	482.12	C22H26O12	[M-H]-	5-O-p-Coumaroyl shikimic acid O-hexoside	Phenolic acids	-	1087400	2538400	1685700	1832300	1492700	661380	566170	503270	823920	857770	565530	418120	1549600	1327800	1800200
pmb3074	337.1	191.1	338.085	C16H18O8	[M-H]-	3-O-p-Coumaroyl quinic acid	Phenolic acids	1899-30-5	3523.8	33308	7683	4167.1	7261.2	5955.5	14594	16645	15198	542190	327170	606820	14763000	8757900	6784100
pmb3081	289.1	97	289.99	C6H11PO11	[M-H]-	Glucarate O-Phosphoric acid	Others	-	4893900	3994800	4376800	3785000	2297000	2393000	3560800	4355300	3389000	4462100	3403200	3552300	9951700	8323300	7389700
pmb3099	153	125	154.03	C4H11O4P	[M-H]-	Diethyl phosphate	Organic acids	598-02-7	240930	193060	213780	242130	245060	219580	176880	221970	210610	219330	163040	243950	189690	274600	175390
pmb3107	359.1	182.1	360.088	C15H20O10	[M-H]-	Syringic acid O-glucoside	Phenolic acids	-	26960	53183	44210	144890	148970	91242	133210	141150	218020	183720	112230	251940	2981700	2115400	2292900
pmb3114	561.1	289.2	562.125	C30H26O11	[M-H]-	Epicatechin-epiafzelechin	Tannins	-	264070	187410	222550	1961100	859100	739550	2287800	2909800	2282100	4934900	3426700	5469900	5580700	5334600	6606100
pmb3894	329.1	229.1	330.061	C17H14O7	[M-H]-	Di-O-methylquercetin	Flavonoids	2068-02-02	288990	578230	421980	287960	491660	421270	1765300	480820	387340	280450	246730	315320	546550	331590	261840
pmd0130	468.3	184	467.268	C22H46NO7P	[M+H]+	LysoPC 14:0(2n isomer)	Lipids	-	18284	17464	19078	7183.1	33557	6574.5	99891	11713	30424	29188	16027	29530	150600	199530	68944
pmd0132	496.33	184	495.296	C24H50NO7P	[M+H]+	LysoPC 16:0(2n isomer)	Lipids	-	405410	117500	257830	136180	848150	118700	1089200	228210	435680	254040	162280	251640	854280	788460	311340
pmd0136	524.36	184	523.325	C26H54NO7P	[M+H]+	LysoPC 18:0	Lipids	-	15085	3189.3	10609	10827	39208	4883.5	37668	14381	10812	5018.2	7202	4917.8	36210	22270	16298
pmd0160	452.3	255.2	453.253	C21H44NO7P	[M-H]-	LysoPE 16:0(2n isomer)	Lipids	-	7083500	897860	2662600	623290	2004200	390660	2786300	2047400	1002100	1820700	1616200	1424900	2695200	2243400	2279100
pme0006	116.1	70.1	115.056	C5H9NO2	[M+H]+	L-Proline	Amino acids and derivatives	147-85-3	43620000	48967000	47504000	5404100	13181000	20802000	11732000	9573100	11812000	8314800	11248000	6030600	4153700	6285600	6341600
pme0008	176.1	113	175.084	C6H13N3O3	[M+H]+	L-Citrulline	Amino acids and derivatives	372-75-8	58906	99022	159310	75758	103870	82011	254800	200090	163670	181260	74185	39863	269960	474760	552010
pme0014	148.1	84	147.045	C5H9NO4	[M+H]+	L-Glutamic acid	Amino acids and derivatives	56-86-0	59187000	42287000	48828000	42698000	40143000	54355000	28462000	38535000	25915000	40906000	49231000	33829000	20970000	25166000	31146000
pme0026	147	84	146.095	C6H14N2O2	[M+H]+	L-(+)-Lysine	Amino acids and derivatives	56-87-1	8072600	10821000	10543000	4694500	3176000	2338300	3772200	4301600	2093900	4443500	2747500	2132100	3863700	5959600	7963900
pme0033	137	119	136.033	C5H4N4O	[M+H]+	Hypoxanthine	Nucleotides and derivatives	68-94-0	17642	11507	34576	37774	42200	31266	70506	32488	16249	19219	16185	21126	10792	25307	9446.6
pme0040	136.1	119	135.049	C5H5N5	[M+H]+	Adenine	Nucleotides and derivatives	73-24-5	2499800	1741000	2369100	7885800	7016400	6230400	6778800	7103600	3124700	3672100	2872300	3633600	2112500	2814800	1205000
pme0085	359.3	196.7	360.07	C18H16O8	[M-H]-	Rosmarinic acid	Phenolic acids	537-15-5	15915	23880	31067	13915	10349	14638	12856	22183	11874	14631	15134	4808.3	9432.1	9401.8	3142.4
pme0120	118.2	101	117.07	C5H11NO2	[M+H]+	5-Aminovaleric acid	Amino acids and derivatives	660-88-8	9974.7	11757	3964.1	6149.8	3639.3	7791.8	4516.5	5921.2	3307.7	7351	3490.6	7225.9	3876.6	4671.4	6844.7
pme0122	189.2	126	188.103	C8H16N2O3	[M+H]+	N6-Acetyl-L-lysine	Amino acids and derivatives	692-04-6	156340	70398	158860	100510	99692	69320	414210	165920	72051	88304	43892	102850	82960	144080	160690
pme0124	173.2	115.5	172.075	C7H12N2O3	[M+H]+	Glycyl-L-proline	Amino acids and derivatives	704-15-4	102660	45294	83362	1433	12646	10056	20040	23198	7419.8	5879.8	3153.2	7992.8	6772.7	11469	4080.3
pme0137	187.2	125	188.069	C7H12N2O4	[M-H]-	N-α-Acetyl-L-glutamine	Amino acids and derivatives	2490-97-3	1595600	1539600	1603400	1498500	1778700	1182700	1650900	1639100	2925300	1808100	1773300	3060000	1600300	1489700	1601900
pme0152	129.1	84	128.051	C5H8N2O2	[M+H]+	5,6-Dihydro-5-methyluracil	Nucleotides and derivatives	696-04-8	9213.4	11165	12540	10853	15991	16415	22064	10655	17812	14081	7906.6	13331	10876	11324	9953.3
pme0170	217.1	158	216.108	C8H16N4O3	[M+H]+	N-α-Acetyl-L-arginine	Amino acids and derivatives	155-84-0	34520	13439	26297	104560	78811	58819	71709	88232	51400	115960	96944	85191	64537	119590	117000
pme0181	170.1	124	169.076	C7H11N3O2	[M+H]+	1-Methylhistidine	Amino acids and derivatives	332-80-9	444460	418500	99509	368070	104820	135160	107800	108650	95702	106610	106210	97959	119720	85476	334400
pme0183	152.1	135	151.043	C5H5N5O	[M+H]+	2-Hydroxy-6-aminopurine	Nucleotides and derivatives	3373-53-3	177750	71943	133880	260920	107700	41711	414020	488360	1571200	1294700	939920	1609100	763760	499050	481220
pme0193	147.07	84	146.06	C5H10N2O3	[M+H]+	L-Glutamine	Amino acids and derivatives	56-85-9	9827900	12361000	12814000	5772500	3954800	2824400	4813700	5031300	2680100	5248400	3433600	2613700	4752600	7496000	8996700
pme0230	268.1	136	267.084	C10H13N5O4	[M+H]+	Adenosine	Nucleotides and derivatives	58-61-7	6813600	1966400	5708300	23605000	20343000	21673000	15735000	16730000	9188600	21832000	12990000	31773000	18342000	19899000	16831000
pme0253	174.1	86	173.094	C8H15NO3	[M+H]+	N-Acetyl-L-leucine	Amino acids and derivatives	1188-21-2	32948	916.7	16884	4374.5	22857	5690.6	137380	28557	5551	12886	5319.8	10499	5593.2	13156	2998.8
pme0257	111.03	80	112.023	C4H4N2O2	[M-H]-	Uracil	Nucleotides and derivatives	66-22-8	274260	284630	158600	172090	126190	222010	185450	494060	196590	124530	198200	135620	303660	138090	264990
pme0264	243.09	127	242.078	C10H14N2O5	[M+H]+	Thymidine	Nucleotides and derivatives	50-89-5	341930	485710	444790	563280	728130	496870	952420	820300	821100	664530	466860	828590	39735	71312	83635
pme0274	132.09	69	131.085	C6H13NO2	[M+H]+	6-Aminocaproic acid	Organic acids	60-32-2	3941600	1486400	3011700	144260	223090	127180	249990	222030	112270	191920	229270	118420	107940	164730	222940
pme0278	191.09	128	190.083	C7H14N2O4	[M+H]+	2,6-Diaminooimelic acid	Amino acids and derivatives	583-93-7	54541	356200	297090	60548	90736	70041	794950	73649	94867	66741	52773	79028	59073	147110	131030
pme0281	165.03	121	166.021	C8H6O4	[M-H]-	Terephthalic acid	Phenolic acids	100-21-0	912710	942970	796830	1037100	1219600	918140	1109600	1096300	2043400	1202500	1017300	1072400	2502800	2088600	1842900
pme0282	165.03	77	166.021	C8H6O4	[M-H]-	Phthalic acid	Organic acids	88-99-3	108010	86986	74528	96444	98087	98217	119910	115290	172940	108600	103660	109450	224010	203960	181010
pme0295	146.07	86	145.065	C6H11NO3	[M+H]+	4-Acetamidobutyric acid	Organic acids	3025-96-5	679440	273410	577570	5028.1	122500	13027	486370	68656	5284	26269	9	44066	101470	156640	83537
pme0321	431.11	285	432.088	C21H20O10	[M-H]-	Kaempferol 7-O-rhamnoside	Flavonoids	20196-89-8	1254700	628280	807660	1413400	1171700	1033000	808500	682230	1225300	2756100	2993800	4714100	2361600	2580700	2479900
pme0376	271.07	151	272.058	C15H12O5	[M-H]-	Naringenin	Flavonoids	480-41-1	138140	122860	139090	111590	450810	106480	205720	192510	57879	72456	82278	98549	885240	477300	623510
pme0434	577.14	407.1	578.142	C30H26O12	[M-H]-	Procyanidin B2	Tannins	29106-49-8	1433900	767140	1032100	4272900	4421900	5236800	6791200	7191700	4070100	3538200	3220100	2930300	918860	1519800	2541500
pme0436	577.14	407.1	578.142	C30H26O12	[M-H]-	Procyanidin B3	Tannins	23567-23-9	7441200	3109300	5261200	31890000	30179000	25083000	32708000	41359000	30257000	27944000	21534000	28818000	23714000	24525000	28634000
pme0443	493.13	331	493.135	C23H25O12+	[M]+	Malvidin 3-O-galactoside (Primulin)	Flavonoids	30113-37-2	18464	8827.5	9	9	9	9	9	9	9	15522	9	19687	185960	463300	437880
pme0444	493.13	331	493.135	C23H25O12+	[M]+	Malvidin 3-O-glucoside (Oenin)	Flavonoids	18470-06-9	9	9	9	9	9	9	9	9	9	10982	6417.3	9	191290	457380	384620
pme0460	291	139	290.067	C15H14O6	[M+H]+	L-Epicatechin	Flavonoids	490-46-0	23582000	19382000	24455000	40730000	39741000	39045000	41289000	42540000	40284000	42318000	37833000	44820000	44758000	43485000	46601000
pme0490	124	78	123.027	C6H5NO2	[M+H]+	Nicotinic acid	Others	59-67-6	102630	137950	107750	111980	122950	131130	196060	96282	61218	84833	85590	80093	82047	116570	157290
pme0500	503.44	323	504.14	C18H32O16	[M-H]-	D-(+)-Melezitose	Others	597-12-6	16430	56569	55161	21364	45325	62143	20375	24382	61338	49752	34856	50002	19778	14692	16310
pme0516	179.16	87	180.053	C6H12O6	[M-H]-	Inositol	Others	87-89-8	75022	279630	166030	193010	169180	132090	84156	139410	181090	130840	139790	153800	113970	182210	331370
pme0519	341	119	342.096	C12H22O11	[M-H]-	D-(+)-Sucrose	Others	57-50-1	25124000	20544000	21559000	25026000	23828000	25419000	20160000	17290000	28897000	20644000	23863000	20390000	5933000	6935600	8480600
pme0534	195.16	74.9	196.047	C6H12O7	[M-H]-	Gluconic acid	Others	526-95-4	837460	945120	934670	1000800	11351000	1102600	1504400	1004200	1105400	1057500	1013700	1362000	2169900	2544700	3521700
pme1002	138.08	103	137.076	C8H11NO	[M+H]+	L-Tyramine	Amino acids and derivatives	51-67-2	202710	244250	237600	580880	547170	162200	1985800	1811900	1574700	316200	290950	424620	1193200	700980	383400
pme1086	306	143	307.068	C10H17N3O6S	[M-H]-	Glutathione reduced form	Amino acids and derivatives	70-18-8	4017300	4433000	3198000	3876600	367240	4525900	333730	289320	2319200	2185200	3222900	2188900	111670	113820	190180
pme1109	152	135	151.043	C5H5N5O	[M+H]+	Guanine	Nucleotides and derivatives	73-40-5	425010	149020	332760	75188	111370	39495	881270	175600	74742	60747	92434	34816	290480	284930	98684
pme1137	140	94	139.022	C6H5NO3	[M+H]+	6-Hydroxynicotinic acid	Alkaloids	5006-66-6	26658	25841	26550	8510	26172	29676	65283	24648	115970	12552	14415	26224	9197.3	12414	17812
pme1173	137	110	136.033	C5H4N4O	[M+H]+	Allopurinol	Nucleotides and derivatives	315-30-0	9302	10900	27310	20930	28857	14334	51476	21438	10626	6505.1	9518	12638	8856.3	16693	5275.9
pme1178	284.09	152	283.078	C10H13N5O5	[M+H]+	Guanosine	Nucleotides and derivatives	118-00-3	9815500	4261900	7711700	3971100	4418600	3866900	3961200	5165300	3066500	3063300	3162500	4404300	2293600	2829300	1774400
pme1184	268.1	152	267.084	C10H13N5O4	[M+H]+	Deoxyguanosine	Nucleotides and derivatives	961-07-9	230760	171470	217230	23100	23853	18202	218460	36853	34779	51537	28650	63494	52822	74872	57593
pme1194	228	112	227.079	C9H13N3O4	[M+H]+	Deoxycytidine	Nucleotides and derivatives	951-77-9	96193	99872	87621	133800	114650	109270	370830	135470	119250	155340	145580	134600	43342	118760	101420
pme1201	273.08	167	274.073	C15H14O5	[M-H]-	Phloretin	Flavonoids	60-82-2	240330	306750	319380	143350	493730	97290	190140	182800	178080	95463	110750	119400	11885000	4808900	5178400
pme1210	150	61	149.042	C5H11NO2S	[M+H]+	L-Methionine	Amino acids and derivatives	63-68-3	2478100	1722800	2523400	279140	571630	247380	488590	600500	355310	295690	242380	164680	124420	148540	156180
pme1228	221.1	204	220.075	C11H12N2O3	[M+H]+	5-Hydroxy-L-tryptophan	Amino acids and derivatives	56-69-9	122890	104660	115760	370730	575820	403540	408450	422380	639290	236190	221270	168070	83149	93967	100310
pme1261	206.13	76	205.117	C9H19NO4	[M+H]+	Pantothenol	Others	16485-10-2	3024.1	1257.1	518.27	290.05	2566.7	4625.8	10912	1344	4280.8	1864.4	1881.7	2467.9	4782.1	12041	9801
pme1286	385	250	384.103	C14H20N6O5S	[M+H]+	S-(5'-Adenosy)-L-homocysteine	Amino acids and derivatives	979-92-0	25658	14670	24476	5579.1	9867	6133.4	6878.3	10507	13438	16992	12703	14586	25640	15661	20171
pme1306	250	134	249.028	C8H12NO6P	[M+H]+	Pyridoxine 5'-phosphate	Others	447-05-2	3393.8	9	4679.7	4476.3	7963.5	4358.3	7853.6	2393.8	9571.9	7447	4350.4	4139.2	5549.5	6843.6	8083.7
pme1373	306	110	307.042	C9H14N3O7P	[M-H]-	2'-Deoxycytidine-5'-monophosphate	Nucleotides and derivatives	1032-65-1	30381	27626	21543	27728	3275.7	24644	6999.2	5757.6	10903	15630	22913	17595	9	3571	11054
pme1383	170.1	134.1	169.065	C8H11NO3	[M+H]+	Pyridoxine	Others	65-23-6	328660	296360	395360	345970	538670	509240	449970	365420	532840	337010	378910	624650	181510	348900	279060
pme1397	271.06	149	271.061	C15H11O5+	[M]+	Pelargonidin	Flavonoids	7690-51-9	121040	33177	73850	17884	58268	9	65654	40615	15173	18462	9	23905	363320	335000	340670
pme1398	465.1	303	465.103	C21H21O12+	[M]+	Delphinidin 3-O-glucoside (Mirtillin)	Flavonoids	50986-17-9	55126000	36158000	51772000	15194000	13541000	9169700	10291000	23266000	9499900	35792000	32188000	37050000	8939900	20765000	25135000
pme1419	164	104	199.032	C6H14ClNO2S	[M-Cl]+	L-Methionine methyl ester	Amino acids and derivatives	2491-18-1	22669	20283	24783	18981	22430	22302	15499	14339	21292	19700	22069	16746	7134.5	5368.5	9853.3
pme1439	165.05	119	164.041	C9H8O3	[M+H]+	p-Coumaric acid	Phenolic acids	501-98-4	62748	31039	57562	39380	68077	28761	52454	50889	46410	25805	21840	39495	48093	55540	39244
pme1474	298	136	297.075	C11H15N5O3S	[M+H]+	5'-Deoxy-5'-(methylthio)adenosine	Nucleotides and derivatives	2457-80-9	20915000	16458000	20300000	9227800	11069000	9045700	6798100	7294900	9938800	11310000	15370000	9681700	7615400	7510300	7878600
pme1738	138.07	95	137.064	C7H9N2O	[M+H]+	3-Carbamyl-1-methylpyridinium(1-Methylnicotinamide)	Others	1005-24-9	9257.6	13049	9377.1	5894.3	2386.3	3379	8068	13085	4959.9	18770	14435	15546	9397.8	7763.1	9998.6
pme1816	353	191	354.079	C16H18O9	[M-H]-	Neochlorogenic acid(5-O-Caffeoylquinic acid)	Phenolic acids	906-33-2	353620	143570	172270	270500	486350	200770	640470	835570	1077700	5612400	2314500	7169200	4855500	4586700	4815300
pme2019	149	59	150.044	C5H10O5	[M-H]-	DL-Arabinose	Others	147-81-9	496020	369290	382770	294430	421810	353510	677480	473240	817700	300640	187250	374860	271020	204280	231750
pme2049	103	57	104.041	C4H8O3	[M-H]-	2-Hydroxybutanoic acid	Organic acids	600-15-7	32270	20414	31022	9	219160	9	19899	16103	9	9	8399.2	9	46735	9	9
pme2122	112.08	95	111.072	C5H9N3	[M+H]+	Histamine	Amino acids and derivatives	51-45-6	70480	83195	62415	93015	65680	106000	145990	130520	77831	91820	80707	98810	63935	94592	95263
pme2237	181.08	101	182.067	C6H14O6	[M-H]-	Dulcitol	Others	608-66-2	7764.1	15762	14161	12313	26562	5644.8	291490	16930	9709.4	9712	11253	6543.2	75047	234470	286420
pme2253	177.14	59	178.038	C6H10O6	[M-H]-	L-Gulonic-γ-lactone	Others	1128-23-0	88301	88614	66410	72996	217530	83772	204380	85979	116600	133500	87072	155480	138770	107350	154550
pme2266	245.09	227	244.075	C10H16N2O3S	[M+H]+	Biotin	Others	58-85-5	50951	73893	103580	118020	132510	97160	111140	93193	156910	131820	67737	119870	81569	34396	37683
pme2268	138	94.01	137.042	C7H7NO2	[M+H]+	Trigonelline	Alkaloids	535-83-1	529320	112360	328920	1475500	2265900	2151600	2279500	2947000	2478400	3877000	1937700	5172200	6262300	4814600	4254200
pme2459	449.1	287.2	448.082	C21H20O11	[M+H]+	Luteolin 7-O-glucoside(Cynaroside)	Flavonoids	5373-11-05	497350	235440	312490	596930	713050	626200	468830	904090	516630	741040	744050	532540	9	74424	87959
pme2482	139.1	92.8	138.026	C7H6O3	[M+H]+	Protocatechuic aldehyde	Flavonoids	139-85-5	44502	28344	22985	161880	156010	35081	150690	82737	214840	182210	146230	245010	201430	217770	239210
pme2559	174	88	175.039	C6H9NO5	[M-H]-	N-Acetylaspartate	Amino acids and derivatives	997-55-7	590860	165080	395760	266160	346010	402860	380070	385410	865110	731210	949480	218880	24983	61052	104110
pme2563	249.3	128	250.049	C8H14N2O5S	[M-H]-	γ-Glu-Cys	Amino acids and derivatives	636-58-8	20615	22800	17518	7938.2	2584.8	10233	13563	3410.1	15712	18395	11504	20370	4510.1	5410.3	7389.7
pme2566	217	199	218.078	C8H14N2O5	[M-H]-	(5-L-Glutamyl)-L-amino acid	Amino acids and derivatives	5875-41-2	83789	95754	73631	89998	135600	109770	173730	136920	297770	136000	128830	165650	68603	103420	223050
pme2596	184.05	148	183.045	C8H9NO4	[M+H]+	4-Pyridoxic acid	Others	82-82-6	131350	115650	128810	213340	240470	156910	228210	386750	250880	225390	180640	287490	342030	418800	299410
pme2617	166	102	165.036	C5H11NO3S	[M+H]+	Methionine sulfoxide	Amino acids and derivatives	62697-73-8	1203400	1116700	1392000	1185200	1515400	1249800	1435900	1463000	1405900	1407600	1391300	1247700	1274100	1401100	1238700
pme2634	118	72	117.07	C5H11NO2	[M+H]+	DL-Norvaline	Amino acids and derivatives	760-78-1	47659000	26003000	40806000	5161500	7267700	5108100	7560000	8399100	6040900	8153000	12163000	4413500	4738900	6039600	6468400
pme2743	194.1	91	193.065	C10H11NO3	[M+H]+	N-Phenylacetylglycine	Amino acids and derivatives	500-98-1	3692.1	6915.1	9	5158.1	17389	7404.4	13685	4709.8	13049	5439.9	3107.7	5281	26139	54195	60591
pme2746	784.2	437	785.122	C27H33N9O15P2	[M-H]-	Flavin adenine dinucleotide(FAD)	Nucleotides and derivatives	146-14-5	15781	26239	23503	13911	35902	34811	24073	31703	26791	31453	44974	22581	79245	50181	46350
pme2758	162	144	163.039	C5H9NO5	[M-H]-	4-Hydroxy-L-glutamic acid	Amino acids and derivatives	3913-68-6	11914	20013	20733	12351	22382	24491	9132	7560.9	30573	16240	4747.3	12593	5256.3	7998.6	5348.9
pme2773	223	134	222.055	C7H14N2O4S	[M+H]+	L-Cystathionine	Amino acids and derivatives	56-88-2	2055.7	1340.2	4468.1	2175.8	2105	950.4	17198	686.4	417.38	269.52	481.12	548.97	4648.2	11197	9057.7
pme2801	167	150	166.042	C6H6N4O2	[M+H]+	7-Methylxanthine	Nucleotides and derivatives	552-62-5	4199.7	2497	3821	9	12578	9	17588	54679	5385.9	2409.5	9	3339.9	9	9	1501.3
pme2890	269	136	268.041	C8H16N2O4S2	[M+H]+	L-Homocystine	Amino acids and derivatives	626-72-2	530690	479780	630130	6450	14186	5565.3	44942	27212	5585.7	6665.5	4440	18995	7787.3	18069	8833
pme2914	161	99	162.044	C6H10O5	[M-H]-	3-Hydroxy-3-methylpentane-1,5-dioic acid	Amino acids and derivatives	503-49-1	1351400	1389700	1324000	904660	2441800	1166000	1067400	1150800	1957900	1107100	1222500	1380100	916350	1719600	918940
pme2960	273.07	153	272.058	C15H12O5	[M+H]+	Naringenin chalcone	Flavonoids	73692-50-9	165120	140600	206140	59208	85733	53050	63989	74035	101240	294380	119140	390910	77476	122700	99362
pme3009	175	99	174.009	C6H6O6	[M+H]+	Trans-Citridic acid	Organic acids	4023-65-8	382730	368110	377700	376860	327280	255560	295080	377670	483220	445730	433290	576520	449700	524350	579070
pme3011	104.06	68.8	103.056	C4H9NO2	[M+H]+	γ-Aminobutyric acid	Organic acids	1956-12-02	4652800	4646500	6455900	222640	1145500	220120	1220400	479340	284860	167280	118280	222340	463990	623580	466580
pme3017	104	58	103.056	C4H9NO2	[M+H]+	2-Aminoisobutyric acid	Amino acids and derivatives	62-57-7	3956200	4280000	4141600	2997700	2633300	2997000	2532400	2824700	3722900	2624300	3358700	2554900	979440	1096200	1288200
pme3033	104	86	103.056	C4H9NO2	[M+H]+	N,N-Dimethylglycine	Amino acids and derivatives	1118-68-9	3520500	2091300	3330600	287300	631450	263950	670080	572730	289380	251400	192270	265550	224750	246950	281650
pme3154	147.07	59	148.064	C6H12O4	[M-H]-	(Rs)-Mevalonic acid	Organic acids	150-97-0	376250	126010	308200	1490400	1087500	1083700	1088100	1055500	1298200	1796700	1362000	2262400	323310	1327300	934730
pme3174	324	112	323.037	C9H14N3O8P	[M+H]+	Cytidine 5'-monophosphate(Cytidylic acid)	Nucleotides and derivatives	63-37-6	112320	25479	79163	47930	37249	15282	42781	62777	33368	54323	37880	65637	65396	90081	51284
pme3184	332	136	331.053	C10H14N5O6P	[M+H]+	2'-Deoxyadenosine-5'-monophosphate	Nucleotides and derivatives	653-63-4	46390	96594	72676	153230	204960	232470	165180	117710	314770	146640	178570	199470	151520	217170	214780
pme3188	323	211	324.021	C9H13N2O9P	[M-H]-	Uridine 5'-monophosphate	Nucleotides and derivatives	58-97-9	843230	184730	476960	230040	154040	93236	216460	222790	164020	344210	133480	360090	104880	136420	284780
pme3207	141.03	59	142.021	C6H6O4	[M-H]-	Trans,trans-Muconic acid	Organic acids	3588-17-8	817510	625340	651910	7659600	10488000	7662000	9939000	13163000	6756700	10172000	13066000	9565200	4252000	4998000	7834900
pme3279	287	153	286.038	C15H10O6	[M+H]+	2'-Hydroxygenistein	Flavonoids	1156-78-1	421770	296990	469000	666570	641580	382370	262600	301470	613290	1219800	1103200	1701000	585710	494560	453200
pme3337	384	252	383.09	C14H17N5O8	[M+H]+	N6-Succinyl Adenosine	Nucleotides and derivatives	4542-23-8	170710	98221	154630	245500	472600	311710	532710	331450	415200	418710	435530	421030	367440	388900	313740
pme3382	160	98	161.059	C6H11NO4	[M-H]-	N-Acetylthreonine	Amino acids and derivatives	17093-74-2	101810	83794	82058	92029	142920	95024	170610	195220	189810	144990	127610	136910	146540	163830	144340
pme3388	189	144	188.114	C7H16N4O2	[M+H]+	H-HomoArg-OH	Amino acids and derivatives	156-86-5	69102	155260	100160	563900	297510	317160	262380	517940	297870	484920	283610	245330	183250	297850	472330
pme3443	207.1	192	208.064	C11H12O4	[M-H]-	Sinapinaldehyde	Phenolic acids	4206-58-0	3547.3	2186.9	1820.1	10451	63694	7219.1	195530	78447	212270	198690	115890	246900	1665200	1155300	716650
pme3459	317.2	299	316.185	C20H28O3	[M+H]+	Caffeyl alcohol	Phenolic acids	469-83-0	9	9	9	10199	9	9	9	9	9	9	9	9	763650	525620	15274
pme3475	273.07	153	272.058	C15H12O5	[M+H]+	Butin	Flavonoids	492-14-8	156670	148850	159170	126390	577110	106830	346250	201510	66879	93065	87556	111350	1160700	850920	927810
pme3705	193.14	73	194.033	C6H10O7	[M-H]-	D-Glucoronic acid	Others	6556-12-03	579310	242970	456980	383030	482560	256890	478560	697350	468140	342830	312170	543220	217700	421290	329790
pme3732	244.09	112	243.073	C9H13N3O5	[M+H]+	Cytidine	Nucleotides and derivatives	65-46-3	217380	216200	229560	277550	341160	332980	1055300	348620	216650	246460	224190	328830	248750	557700	352840
pme3827	198.2	152.2	197.059	C9H11NO4	[M+H]+	3,4-Dihydroxy-DL-phenylalanine	Amino acids and derivatives	63-84-3	356140	419940	253290	472330	653610	144510	403320	363310	133240	139440	94745	58486	131220	211010	115480
pme3961	252	136	251.089	C10H13N5O3	[M+H]+	Deoxyadenosine	Nucleotides and derivatives	958-09-8	191930	87060	168790	203890	176820	174490	435650	286890	181920	278350	160510	409050	208170	259630	180730
pme3967	312	180	311.107	C12H17N5O5	[M+H]+	2-(Dimethylamino)guanosine	Nucleotides and derivatives	2140-67-2	350930	445100	385750	48882	103200	107790	211960	72382	92275	81375	90731	78828	48938	127360	120780
pme3968	166	149.05	165.057	C6H7N5O	[M+H]+	7-Methylguanine	Nucleotides and derivatives	578-76-7	11659	3600	13298	9	29077	3924.3	34852	93448	6261.3	5521.5	1546.9	5355.5	9	9	2302.5
pmf0374	477.1	314	478.091	C22H22O12	[M-H]-	2,6-Dimethyl-7-octene-2,3,6-triol	Flavonoids	5041-82-7	89846	141120	172470	388090	749100	1056200	443700	306220	728060	395620	482390	455310	627330	485350	598200
pmf0440	163.1	91.1	162.061	C10H10O2	[M+H]+	4-MethoxycinnaMaldehyde	Phenolic acids	1963-36-6	58449	44564	58978	58721	85178	58704	66134	63919	80319	69387	67987	71583	70778	101540	90141
pmf0585	116.1	70	115.056	C5H9NO2	[M+H]+	DL-Proline	Amino acids and derivatives	609-36-9	42679000	54365000	52859000	5465600	14751000	22461000	12353000	10501000	12873000	8616400	11468000	6662100	4411500	6299200	7156300
pmn001367	315.07	153.017	316.065	C13H16O9	[M-H]-	Protocatechuic acid-4-glucoside	Phenolic acids	-	312900	145150	168170	1007800	4460900	9523000	1798600	3314900	1247800	1641700	907460	1983000	1423200	4829900	8248900
pmn001382	515.12	353.088	516.105	C25H24O12	[M-H]-	Isochlorogenic acid A	Phenolic acids	2450-53-5	157560	175880	111130	136140	174280	232710	356620	609430	252130	343600	135550	156670	704020	4589600	12260000
pmn001384	515.12	353.088	516.105	C25H24O12	[M-H]-	Isochlorogenic acid C	Phenolic acids	57378-72-0	172970	178160	144360	154430	186980	245960	358790	607520	270690	389130	383140	98340	796340	4737100	12778000
pmn001399	405.1	243.1	406.108	C20H22O9	[M-H]-	2,4,6,4'-Tetrahydroxy-stilbene-2-O-D-glucopyranoside	Others	-	451110	429840	396290	304290	319520	323550	166300	219510	216510	339780	369710	248210	16363	10947	9
pmn001406	695.4	473.3	696.364	C37H60O12	[M-H]-	3-O-β-D-glucopyranosyl platycodigenin methylester	Terpenoids	-	8251.5	21055	31186	71149	392980	16196	541150	37245	55761	42940	65738	27710	16794000	13599000	6145500
pmn001419	325.09	163.04	326.085	C15H18O8	[M-H]-	1-O-[(E)-p-Cumaroyl]-β-D-glucopyranose	Phenolic acids	-	9	213500	59943	9	547630	9	211630	268290	490860	879280	513090	905410	4485300	5005800	4805700
pmn001420	341.08	179.03	342.079	C15H18O9	[M-H]-	1-O-[(E)-Caffeoyl]-β-D-glucopyranose	Phenolic acids	-	5572400	3336800	5613900	6051800	8151400	6265100	6743600	8817600	6736100	8571500	5183400	14268000	5744700	5863000	6027200
pmn001421	337.09	191.05	338.085	C16H18O8	[M-H]-	3-O-(E)-p-Coumaroyl quinic acid	Phenolic acids	87099-71-6	410710	234300	516090	815850	2161300	762000	2507900	2953900	2258200	29219000	29161000	35994000	16328000	11005000	8991100
pmn001495	329.2	229.1	330.251	C19H38O4	[M-H]-	Hexadecanoic acid 2,3-dihydroxypropyl ester	Lipids	542-44-9	336470	618420	476000	311500	623160	507550	1768800	543780	475560	287540	258150	362720	590310	387860	321340
pmn001514	321	125	322.021	C14H10O9	[M-H]-	Digallic??Acid	Phenolic acids	536-08-3	637650	513600	580430	634800	939260	625610	849410	920430	745520	886510	629530	1101100	1408500	943070	1010900
pmn001517	329.1	167	330.113	C15H22O8	[M-H]-	3,4,5-Trimethoxyphenyl-β-D-Glucopyranoside	Phenolic acids	-	625910	700950	636770	676220	448570	334220	829800	523560	1004800	766300	658740	856060	3634300	2958100	2820200
pmn001518	331.1	271	332.059	C13H16O10	[M-H]-	1-O-Galloyl-β-D-glucose	Phenolic acids	-	242450	199260	237540	164560	204740	172510	1458500	2244300	1915500	2747200	2245000	3151400	566810	2150800	2851700
pmn001523	473	169	474.028	C21H14O13	[M-H]-	1,3-Trigallic acid	Phenolic acids	-	378130	283040	544030	223260	371750	374560	896670	845300	1050800	1958100	1945100	2090200	3485300	5298400	3434200
pmn001524	473	321	474.028	C21H14O13	[M-H]-	1,4-Trigallic acid	Phenolic acids	-	131480	89361	114210	62258	78770	111350	187370	188660	226090	420320	488390	354970	655260	802990	588900
pmn001525	477.1	169	478.125	C23H26O11	[M-H]-	3,5-Di-O-galloylshikimic acid	Phenolic acids	95753-52-9	62466	50425	54897	67747	9	65091	9	96226	160830	403090	118990	589310	20559000	15711000	17389000
pmn001526	483.08	331.077	484.065	C20H20O14	[M-H]-	1,6-Bis-O-galloyl-β-D-glucose	Phenolic acids	-	136470	43899	113140	51533	107720	24393	484070	315380	1469800	1842400	414570	2750900	4912600	3178300	3419000
pmn001529	629.1	169	630.063	C28H22O17	[M-H]-	Tri-O-Galloylshikimic acid	Phenolic acids	-	9	4682.7	9	3123.8	9	9	10582	6822.7	9	9324.3	9	13340	84914	38368	43485
pmn001534	787.1	169	788.078	C34H28O22	[M-H]-	1,2,3,6-Tetragalloyl glucose	Phenolic acids	79886-50-3	9	4091.8	5521.3	58625	48790	130600	143740	343110	190490	302670	222670	176270	708760	1206400	2418100
pmn001578	255.23	255.23	256.219	C16H32O2	[M-H]-	Hexadecanoic acid	Lipids	1957-10-03	2010400	2066200	1697200	1475700	2134700	1182000	12090000	1564300	1006900	822280	835410	1009800	1238000	1199300	1056500
pmn001583	609.1	300	610.126	C27H30O16	[M-H]-	Bioquercetin	Flavonoids	52525-35-6	9	9	402260	9	939030	9	21858	9	9	136430	84178	467110	667380	650340	707890
pmn001588	665.2	323.1	666.184	C24H42O21	[M-H]-	Nystose	Others	13133-07-8	3350600	812100	1348300	1097600	625530	388790	855010	599780	621450	1530000	717200	1642100	439210	605950	763150
pmn001611	253.2	253.2	254.225	C16H30O2	[M-H]-	Palmitoleic acid	Lipids	373-49-9	644830	496600	664300	757000	683200	712060	1830300	949990	834120	687930	587720	249030	1307400	992410	736850
pmn001627	331.1	169	332.059	C13H16O10	[M-H]-	Glucogallin	Phenolic acids	58511-73-2	11103000	11316000	10130000	5719300	6446800	4966000	13027000	22055000	18424000	21907000	19463000	23119000	8318200	18812000	23406000
pmn001640	449.1	316	450.062	C20H18O12	[M-H]-	Betmidin(Myricetin 3-α-L-arabinofuranoside)	Flavonoids	35589-22-1	1778400	1415300	1680500	1883800	2255300	1418700	2165500	3381100	3132700	10403000	5272300	15608000	12049000	8491700	14142000
pmn001646	865.2	577.1	866.206	C45H38O18	[M-H]-	Procyanidin C1	Tannins	37064-30-5	313130	111900	117250	1903100	1597100	984570	1715400	2088800	1700800	1557200	742400	1613900	1653000	1296500	2054600
pmn001647	865.2	713.2	866.206	C45H38O18	[M-H]-	Procyanidin C2	Tannins	37064-31-6	200040	62570	108040	1102300	1263800	779500	1264900	1572500	1395000	920440	641150	771440	1396500	1065000	1872900
pmn001649	1153.3	1001.2	1154.22	C60H50O24	[M-H]-	Cinnamtannin A2	Tannins	86631-38-1	9	9	9	44901	32710	37723	46124	87243	59893	44772	46966	46451	94779	49091	52486
pmn001650	1153.3	575.1	1154.22	C60H50O24	[M-H]-	Cinnamtannin B2	Tannins	88038-12-4	9253.7	3773.6	4984.3	101160	101780	48511	125920	198490	88018	93895	56824	64844	170850	108920	132280
pmn001660	381.2	235.1	382.177	C20H30O7	[M-H]-	Cinncassiol A	Phenolic acids	73599-11-8	162810	310470	223160	298650	238250	257950	251170	167010	449000	155910	146690	234140	425940	132310	86484
pmn001661	381.2	337.2	382.177	C20H30O7	[M-H]-	Cinncassiol C1	Phenolic acids	73613-35-1	214980	83275	126260	153230	264200	233800	234400	350020	257270	201570	197350	209470	125420	148040	268690
pmn001667	577.14	407.1	578.142	C30H26O12	[M-H]-	Procyanidin B4	Tannins	29106-51-2	523280	219000	374210	3279000	3131500	2320500	3723300	5219200	3317200	2366400	1664000	2302100	2437500	2595800	3130700
pmn001668	415.1	161	416.128	C22H24O8	[M-H]-	Apigenin-3-O-α-L-rhamnoside	Flavonoids	-	67289	275880	130590	111040	92730	143740	55279	109150	38701	72533	125420	23199	60972	39730	59302
pmn001680	163.04	119.051	164.041	C9H8O3	[M-H]-	Coumaric acid	Phenolic acids	500-05-0	9	19367	16605	9	9	9	9	9	25356	9	9	9	57313	121840	99860
pmn001681	165.09	149.061	166.09	C10H14O2	[M-H]-	1-(4-Methoxyphenyl)-1-propanol	Phenolic acids	5349-60-0	9	9	9	9	9	9	115.97	9	9	9	9	9	9	9	9
pmn001682	179.03	135.046	180.035	C9H8O4	[M-H]-	Sorbic acid	Phenolic acids	110-44-1	36334	26336	51553	54636	1208900	64786	115280	67619	79359	59800	34097	67534	141690	139170	66456
pmn001684	225.11	147.082	226.107	C12H18O4	[M-H]-	Tuberonic Acid	Phenolic acids	124649-26-9	9	9	9	9	5503.8	9	9	9	9	9	9	9	59777	9	94473
pmn001688	295.23	195.14	296.214	C18H32O3	[M-H]-	9S-Hyroxy-10E,12E-octadecadienoic acid	Lipids	-	1203800	851280	989650	573480	1947100	2759200	11188000	799950	347920	517280	642600	384880	491060	465940	392670
pmn001690	327.1	165.093	328.133	C16H24O7	[M-H]-	3-Hydroxy-4-isopropylbenzylalcohol 3-glucoside	Phenolic acids	-	369050	373870	478710	415990	401400	307100	206160	221770	157550	162730	221500	251180	9	9	9
pmn001691	327.22	291.198	328.202	C18H32O5	[M-H]-	9,12,13-Trihyroxy-10,15-octadecadienoic acid	Lipids	-	9	3550	2833.3	3503.1	22481	3882.6	9	6343.6	8457.3	7704.7	6367.9	9671.1	14462	7550.6	9122.5
pmn001694	329.23	229.146	330.217	C18H34O5	[M-H]-	9,10,13-Trihyroxy-11-octadecadienoic acid	Lipids	-	319120	629000	447500	310180	575980	471570	1745200	477000	405210	275650	257440	370380	533480	346820	329840
pmn001695	371.1	249.063	372.088	C16H20O10	[M-H]-	Trihydroxycinnamoylquinic acid	Phenolic acids	-	1179100	858360	975150	2909800	1907700	1994000	1098700	1780800	358030	2574600	2056000	867680	2195400	2494200	2467200
pmn001697	445.08	269.051	446.068	C21H18O11	[M-H]-	Apigenin-7-O-β-D-glucuronide	Flavonoids	-	202640	207190	209660	176020	167960	262050	174010	283330	144700	119510	310360	106420	14906	12206	6936.9
pmn001705	471.35	471.35	472.323	C30H48O4	[M-H]-	3,24-Dihydroxy-17,21-semiacetal-12(13)oleanolic fruit	Terpenoids	-	568680	72239	265770	4301700	2671800	1517400	3278100	4217400	4274400	3267500	1847000	2314200	2266500	2733200	3269700
pmn001706	471.35	471.35	472.323	C30H48O4	[M-H]-	2-Hydroxyoleanolic acid	Terpenoids	26707-60-8	2467700	487630	1137100	7256200	5350600	2882300	5234000	6495500	5590300	4451600	3698000	3017900	4210900	2862600	3936700
pmn001707	485.33	485.329	486.303	C30H46O5	[M-H]-	Quillaic acid	Phenolic acids	631-01-6	1641800	786100	1317000	9349000	22915000	18734000	7535800	8675900	5080800	7769300	9585400	8806200	300260	747110	9
pmn001708	487.34	425.344	488.317	C30H48O5	[M-H]-	Asiatic acid	Terpenoids	464-92-6	16859	9	6660.9	57806	48801	21612	134210	283650	146530	74382	74145	58615	29966	77981	133670
pmn001709	487.34	425.344	488.317	C30H48O5	[M-H]-	Asiatic acid(isomers)	Terpenoids	-	13898	755.11	7969.7	79849	55211	28941	137100	302340	139650	93390	78089	56757	30602	78501	142180
pmp000001	301.07	286.05	300.053	C16H12O6	[M+H]+	Hispidulin	Flavonoids	1447-88-7	1942.7	2267.9	1310.5	19890	8160.9	1938.2	16945	2960	4965.5	4023.6	1859.3	3408.2	57852	40229	44486
pmp000004	331.08	316.06	330.074	C17H14O7	[M+H]+	Jaceosidin	Flavonoids	18085-97-7	4467.5	1600	2207.4	1577.2	21364	658.41	20198	16755	5979	3395.2	2871.3	5921.7	258830	154170	129890
pmp000030	292.2	292.197	291.166	C17H25NO3	[M+H]+	Sessilifoliamide C	Alkaloids	-	559750	250630	413890	409100	500090	522490	267510	732770	395020	517550	461570	779230	464700	686070	1066800
pmp000086	269.1	177.05	268.081	C13H16O6	[M+H]+	1-Feruloyl-sn-glycerol	Phenolic acids	-	39334	24698	27238	8134.6	59443	9746	11726	4402.7	14015	20116	12293	27473	113650	64912	36414
pmp000087	269.1	177.05	268.081	C13H16O6	[M+H]+	2-Feruloyl-sn-glycerol	Phenolic acids	-	40683	30781	33296	8803.1	69517	14136	9	8935.7	14986	21355	8874.1	28445	60989	74705	41252
pmp000097	142.08	124.07	141.07	C7H11NO2	[M+H]+	Guvacoline	Alkaloids	495-19-2	1235600	1337500	1637200	516880	688760	481600	1353500	989440	1985600	533410	465040	951390	1860000	1634900	1501700
pmp000098	156.1	142.95	155.085	C8H13NO2	[M+H]+	Arecoline	Alkaloids	63-75-2	778900	813050	1004500	624660	640580	610440	496750	445080	430980	470190	495380	487290	283210	361220	416500
pmp000100	867.21	715.16	866.172	C45H38O18	[M+H]+	Arecatannin B1	Tannins	79763-28-3	1875.2	222.12	1269	7824.9	9131.6	6345.9	14266	19609	13454	6661.7	6822.5	4106.1	3124.1	6136.8	12071
pmp000101	867.21	715.16	866.172	C45H38O18	[M+H]+	Arecatannin C1	Tannins	87727-69-3	2475.8	1466.8	1142.6	6732.5	8725.8	4978	10439	12231	12821	7136.9	4792.6	8214.6	22467	16892	16600
pmp000194	519.11	271.05	518.085	C24H22O13	[M+H]+	Malonyglygenistin	Flavonoids	-	1684500	2773000	2042500	410780	647680	1036400	826440	1644000	645930	814350	1528500	327790	25720	33118	56983
pmp000231	339.1	147.04	338.085	C16H18O8	[M+H]+	Trans-3-O-p-coumaric quinic acid	Phenolic acids	-	102270	64167	125440	213150	523350	201280	716790	911190	841880	11476000	7649600	13038000	6799800	4010600	3113400
pmp000232	339.1	147.04	338.085	C16H18O8	[M+H]+	Cis-3-p-coumaric quinic acid	Phenolic acids	-	9624.1	17601	19319	11493	11279	5083.3	9945.3	26114	4235.9	15692	7396.8	12789	189820	147590	99606
pmp000269	489.35	407.33	488.317	C30H48O5	[M+H]+	Arjunic Acid	Terpenoids	31298-06-3	265380	64192	193370	282900	308000	132280	297760	347600	343520	194130	139110	144900	86054	103620	191280
pmp000271	505.35	423.325	504.312	C30H48O6	[M+H]+	1β,2α,3α,19α-Tetrahydroxyurs-12-en-28-oic acid	Terpenoids	-	5739.2	1328.8	4697.4	232250	523350	91704	382640	583290	366000	147940	96568	65147	32127	73072	98571
pmp000545	355.1	337.119	354.079	C16H18O9	[M+H]+	4-Caffeoylquinic acid	Phenolic acids	905-99-7	39387	36484	58429	84924	104250	174170	117010	117470	189170	116910	80868	111040	84214	108980	108740
pmp000548	301.07	286.04	300.053	C16H12O6	[M+H]+	Pratensein	Flavonoids	2284-31-3	978.63	787.55	9	15243	6494.3	1355.4	14092	2212.2	3432.8	2775.2	1187.9	2621.5	48175	34641	39652
pmp000562	257.1	153	256.064	C15H12O4	[M+H]+	Pinocembrin	Flavonoids	480-39-7	7223.6	8533.4	7606.3	8327.3	103280	2963.1	97205	33195	68468	25150	62512	8375	44674	89714	148630
pmp000571	271.06	153.01	270.044	C15H10O5	[M+H]+	Apigenin	Flavonoids	520-36-5	83340	127410	73223	31952	47003	62264	26702	45944	12153	30540	64861	24524	101270	90824	91103
pmp000583	477.1	301.07	476.076	C22H20O12	[M+H]+	Diosmetin-7-O-glucuronide	Flavonoids	35110-20-4	12745	3486.7	27439	3246.2	22601	2450.9	17447	9	4521.3	3955.8	8531.3	6497.3	2047.4	9	3419.5
pmp000585	519.11	433.11	518.085	C24H22O13	[M+H]+	Apigenin-7-O-(6-O-Malonyl Glucoside)	Flavonoids	-	5060.7	3726.8	7259.1	11390	10690	14913	12077	17866	18829	20157	19156	16606	1051.8	9	2232.1
pmp000589	551.1	303.051	550.074	C24H22O15	[M+H]+	Quercetin-7-O-(6'-O-malonyl)-β-D-glucoside	Flavonoids	-	1274.2	1560.6	2480.6	1976.4	1772.6	3291.1	2092.6	620.54	5778.5	5187.7	925.77	6291.1	35645	24410	21360
pmp000604	435.12	273.07	434.102	C21H22O10	[M+H]+	Erythromycin-6-O-β-D-glucoside	Others	-	76702	37540	51113	53081	132010	49169	44195	74127	86095	169940	111290	244110	126670	237330	239130
pmp000967	205.1	188.1	204.08	C11H12N2O2	[M+H]+	Tryptophan	Amino acids and derivatives	73-22-3	36717000	33507000	37451000	45132000	42211000	40735000	44966000	45735000	45420000	43452000	42363000	42456000	18350000	23322000	21956000
pmp001086	127	97	126.026	C6H6O3	[M+H]+	5-Hydroxymethylfurfural	Phenolic acids	67-47-0	598900	712380	698330	1126800	1365000	774180	1278900	1139300	1676600	1548900	1494700	1610800	586290	530200	602010
pmp001113	153.05	125.06	152.041	C8H8O3	[M+H]+	Dihydro-p-coumarat	Phenolic acids	-	6269.4	3042.8	4361.5	1732.6	4208.9	7810.7	4630.9	4379.5	2543.4	11924	5949.3	13698	10127	10461	10217
pmp001133	279.23	173.133	278.193	C17H28NO2+	[M+H]+	N-methyldendrobine	Alkaloids	-	35770	36577	28452	31908	27423	28369	134180	29939	25891	28615	27104	26181	28699	20588	26662
pmp001198	132.1	57.1	131.085	C6H13NO2	[M+H]+	6-Deoxyfagomine	Alkaloids	197449-09-5	4457900	2153500	3542000	188150	318960	195740	386050	320110	199510	267150	314430	154670	166470	259580	240280
pmp001200	314.1	145	313.117	C18H19NO4	[M+H]+	Methoxy-N-Caffeoyltyramine	Alkaloids	-	967040	1938100	1960000	3209600	1568300	60398	2519600	2461000	321550	224450	27469	232020	410980	457820	348010
pmp001213	166.08	120.08	165.07	C9H11NO2	[M+H]+	Phenylalanine	Amino acids and derivatives	63-91-2	34157000	22142000	30875000	29097000	25193000	21941000	26568000	34481000	15330000	25723000	32696000	12361000	6102000	8664200	8093200
pmp001250	520.34	184.07	520.304	C26H51NO7P+	[M]+	PC(18:2)	Lipids	-	11680000	3548600	6962200	1984500	4938000	1293800	11184000	3190400	2898200	3107200	2009700	2634800	4969300	6017500	3214500
pmp001251	520.34	184.07	520.304	C26H51NO7P+	[M]+	PC(18:2)isomer	Lipids	-	24440000	10823000	18493000	14161000	26786000	5628500	45532000	24523000	31713000	24687000	18733000	22340000	33811000	41509000	33437000
pmp001255	314.14	177.055	313.131	C18H19NO4	[M+H]+	N-Trans-feruloyltyramine	Alkaloids	66648-43-9	1813300	3446200	3307100	5846300	3109100	106920	4666000	4324300	578260	389080	48182	396730	733110	906650	643420
pmp001256	314.14	177.055	313.131	C18H19NO4	[M+H]+	N-Cis-feruloyltyramine	Alkaloids	80510-09-4	1738200	3697900	3517100	5948300	3090700	119070	4544800	4847400	598610	406780	53549	435120	732780	836250	596490
pmp001257	272.22	254.211	271.194	C15H29NO3	[M+H]+	Tridecanoyl glycine	Amino acids and derivatives	-	61772	45768	72882	64151	25449	16597	26382	35541	2130	22038	6942.2	32994	2428.7	3294.8	2260
pmp001264	274.28	256.265	273.243	C16H35NO2	[M+H]+	Hexadecylsphingosine	Lipids	-	7110300	6475400	5963600	6041700	3803100	4596500	3690200	6830900	8371800	6174500	6532500	7546000	6121100	7975700	6336100
pmp001270	494.33	184.073	493.282	C24H48NO7P	[M+H]+	LysoPC(16:1)	Lipids	-	109510	65091	88627	84208	229850	33892	1365200	171000	287530	227420	188810	216820	693150	1070800	470420
pmp001272	478.29	337.275	477.253	C23H44NO7P	[M+H]+	3-{(2-Aminoethoxy)(hydroxy)phosphoryl]oxy}-2-12-octadecadienoate	Alkaloids	-	4059400	468050	1727200	381680	1444900	186570	4910700	1270900	866090	1068300	750690	783700	1284700	2089700	1300200
pmp001273	520.34	184.074	519.296	C26H50NO7P	[M+H]+	LysoPC(18:2)	Lipids	-	11781000	3537800	7164000	2462800	5173300	1344200	11395000	3128600	2926000	3170600	2016300	2619600	5232900	5282500	2917700
pmp001274	542.32	483.248	541.282	C28H48NO7P	[M+H]+	2-Hydroxy-5,8,11,14,17-icosapentaenoyloxy]propyl-2-(trimethylammonio)ethyl phosphate	Alkaloids	-	99114	35320	68652	14686	30306	8376.7	40786	12983	11970	14947	13110	12659	20410	18825	7746.7
pmp001277	454.3	313.276	453.253	C21H44NO7P	[M+H]+	3-{(2-Aminoethoxy)(hydroxy)phosphoryl]oxy}-2-hydroxypropyl palmitate	Alkaloids	-	2656600	356060	1154800	253220	904250	172860	1342300	831120	455760	853420	660980	608450	1103900	1053300	956800
pmp001281	522.36	184.074	521.311	C26H52NO7P	[M+H]+	LysoPC(18:1)	Lipids	-	2854100	1196000	1844200	504650	996780	436220	2590500	827120	503540	1013000	661060	416030	818260	556610	450100
pmp001282	544.34	485.266	543.296	C28H50NO7P	[M+H]+	Propyl2-(trimethylammonio)ethyl phosphate	Others	-	21866	10093	12537	6503.1	10411	3526.1	49847	10148	14740	12244	11266	7256.2	13291	16939	6681.2
pmp001283	355.29	337.275	354.251	C21H38O4	[M+H]+	Glyceryl linoleate	Lipids	26545-74-4	55016	75885	71506	268690	363460	170840	444720	139110	498770	175970	134440	171360	169870	281710	274210
pmp001285	149.02	65.0406	148.012	C8H4O3	[M+H]+	Phthalic anhydride	Phenolic acids	85-44-9	259910	263510	329580	281870	280890	249950	347100	243610	299370	282440	242030	283160	246070	289850	274620
pmp001286	524.37	184.073	523.325	C26H54NO7P	[M+H]+	LysoPC(18:0)	Lipids	-	299140	90267	179830	220300	338070	112280	272230	320040	63660	114060	110430	112240	430490	256800	252490
pmp001287	120.08	103.055	119.067	C8H9N	[M+H]+	N-Benzylmethylene isomethylamine	Alkaloids	-	6213800	2537500	4491000	3834200	2730600	2383800	3248200	5435000	1338200	2956300	5103700	957160	458240	662310	661720
